# Supplementary material for: Research priorities in fragility fractures of the lower limb and pelvis: a UK priority setting partnership with the James Lind Alliance
Source: PubMed Central journal article supplement — BMJ Open. 2018 Oct 3;8(10):e023301. doi: 10.1136/bmjopen-2018-023301 (PMC6194466; doi:10.1136/bmjopen-2018-023301), 2018-10-03
Supplement: bmjopen-2018-023301.draft_revisions.pdf [file bmjopen-2018-023301.draft_revisions.pdf]

# BMJ Open

BMJ Open is committed to open peer review. As part of this commitment we make the peer review history of every article we publish publicly available.

When an article is published we post the peer reviewers' comments and the authors' responses online. We also post the versions of the paper that were used during peer review. These are the versions that the peer review comments apply to.

The versions of the paper that follow are the versions that were submitted during the peer review process. They are not the versions of record or the final published versions. They should not be cited or distributed as the published version of this manuscript.

BMJ Open is an open access journal and the full, final, typeset and author-corrected version of record of the manuscript is available on our site with no access controls, subscription charges or pay-per-view fees (<http://bmjopen.bmj.com>).

If you have any questions on BMJ Open's open peer review process please email [editorial.bmjopen@bmj.com](mailto:editorial.bmjopen@bmj.com)

# BMJ Open

## Research Priorities in Fragility Fractures of the Lower Limb and Pelvis: A UK Priority Setting Partnership with the James Lind Alliance

|                               |                                                                                                                                                                                                                                                                                                                                                                                                                                                                                                                                                                                                                                                                                                                                                                                                                                                                                                                                                                                                                                                                                                                                                                                                                                                                                    |
|-------------------------------|------------------------------------------------------------------------------------------------------------------------------------------------------------------------------------------------------------------------------------------------------------------------------------------------------------------------------------------------------------------------------------------------------------------------------------------------------------------------------------------------------------------------------------------------------------------------------------------------------------------------------------------------------------------------------------------------------------------------------------------------------------------------------------------------------------------------------------------------------------------------------------------------------------------------------------------------------------------------------------------------------------------------------------------------------------------------------------------------------------------------------------------------------------------------------------------------------------------------------------------------------------------------------------|
| Journal:                      | <i>BMJ Open</i>                                                                                                                                                                                                                                                                                                                                                                                                                                                                                                                                                                                                                                                                                                                                                                                                                                                                                                                                                                                                                                                                                                                                                                                                                                                                    |
| Manuscript ID                 | bmjopen-2018-023301                                                                                                                                                                                                                                                                                                                                                                                                                                                                                                                                                                                                                                                                                                                                                                                                                                                                                                                                                                                                                                                                                                                                                                                                                                                                |
| Article Type:                 | Research                                                                                                                                                                                                                                                                                                                                                                                                                                                                                                                                                                                                                                                                                                                                                                                                                                                                                                                                                                                                                                                                                                                                                                                                                                                                           |
| Date Submitted by the Author: | 09-Apr-2018                                                                                                                                                                                                                                                                                                                                                                                                                                                                                                                                                                                                                                                                                                                                                                                                                                                                                                                                                                                                                                                                                                                                                                                                                                                                        |
| Complete List of Authors:     | <p>Fernandez, Miguel; University of Oxford Nuffield Department of Orthopaedics Rheumatology and Musculoskeletal Sciences, Oxford Trauma; University Hospitals Coventry and Warwickshire NHS Trust, Trauma &amp; Orthopaedic Surgery</p> <p>Arnel, Laura; University of Oxford Nuffield Department of Orthopaedics Rheumatology and Musculoskeletal Sciences, Oxford Trauma</p> <p>Gould, Jenny; Patient representative</p> <p>McGibbon, Alwin; Patient representative</p> <p>Grant, Richard; Patient representative</p> <p>Bell, Philip; Patient representative</p> <p>White, Stuart; Royal Sussex County Hospital</p> <p>Baxter, Mark; University Hospital Southampton NHS Foundation Trust</p> <p>Griffin, Xavier; University of Oxford Nuffield Department of Orthopaedics Rheumatology and Musculoskeletal Sciences, Kadoorie Centre</p> <p>Chesser, Tim; North Bristol NHS Trust, Trauma &amp; Orthopaedics</p> <p>Keene, David; University of Oxford Nuffield Department of Orthopaedics Rheumatology and Musculoskeletal Sciences, Oxford Trauma</p> <p>Kearney, R.S.; University of Warwick,</p> <p>White, Catherine; James Lind Alliance</p> <p>Costa, Matthew; University of Oxford, Nuffield Department of Orthopaedics, Rheumatology, and Musculoskeletal Sciences</p> |
| Keywords:                     | Adult orthopaedics < ORTHOPAEDIC & TRAUMA SURGERY, Musculoskeletal disorders < ORTHOPAEDIC & TRAUMA SURGERY, Hip < ORTHOPAEDIC & TRAUMA SURGERY, fragility fractures                                                                                                                                                                                                                                                                                                                                                                                                                                                                                                                                                                                                                                                                                                                                                                                                                                                                                                                                                                                                                                                                                                               |
|                               |                                                                                                                                                                                                                                                                                                                                                                                                                                                                                                                                                                                                                                                                                                                                                                                                                                                                                                                                                                                                                                                                                                                                                                                                                                                                                    |

SCHOLARONE™  
Manuscripts

1  
2  
3 **Research Priorities in Fragility Fractures of the Lower Limb and Pelvis: A UK Priority**  
4 **Setting Partnership with the James Lind Alliance.**  
5

6 M. A. Fernandez<sup>1,2\*</sup>, L. Arnel<sup>1</sup>, J. Gould<sup>3</sup>, A. McGibbon<sup>3</sup>, R. Grant<sup>3</sup>, P. Bell<sup>3</sup>, S. White<sup>4</sup>,  
7 M. Baxter<sup>5</sup>, X. L. Griffin<sup>1</sup>, T. J. S. Chesser<sup>6</sup>, D. J. Keene<sup>1</sup>, R. Kearney<sup>7</sup>, C. White<sup>8</sup>, and M.  
8 L. Costa<sup>1</sup>  
9

10  
11  
12 <sup>1</sup>Oxford Trauma, University of Oxford, Kadoorie Centre, John Radcliffe Hospital,  
13 Headley Way, Oxford OX3 9DU, UK  
14

15 <sup>2</sup>University Hospitals Coventry & Warwickshire NHS Trust, Clifford Bridge Road,  
16 Coventry, CV2 2DX, UK  
17

18 <sup>3</sup> Patient representatives, UK  
19

20 <sup>4</sup>Royal Sussex County Hospital, Brighton, BN2 5BE, UK  
21

22 <sup>5</sup>University Hospital Southampton NHS Foundation Trust, Tremona Road,  
23 Southampton, SO16 6YD, UK  
24

25 <sup>6</sup>North Bristol NHS Trust, Southmead Hospital, Bristol BS10 5NB, UK  
26

27 <sup>7</sup>University of Warwick, Clinical Trials Unit, Gibbet Hill Road, Coventry, CV4 7AL, UK  
28

29 <sup>8</sup>James Lind Alliance advisor (to Feb 2018), National Institute for Health Research,  
30 University of Southampton, Enterprise Road, Southampton, SO16 7NS, UK  
31

32 \*corresponding author: Mr M. A. Fernandez, Oxford Trauma, University of Oxford,  
33 Kadoorie Centre, John Radcliffe Hospital, Headley Way, Oxford OX3 9DU, UK.  
34 [miguel.fernandez@ndorms.ox.ac.uk](mailto:miguel.fernandez@ndorms.ox.ac.uk) Tel. 07939250006  
35

36  
37  
38  
39  
40  
41 **Keywords:** Adult orthopaedics, fragility fractures, lower limb, priority setting  
42 partnership  
43

44 **Word count:** 2434  
45  
46  
47  
48  
49  
50  
51  
52  
53  
54  
55  
56  
57  
58  
59  
60

## ABSTRACT

**Objective:** To determine research priorities in fragility fractures of the lower limb and pelvis, which represent the shared priorities of patients, their friends and families, carers, and healthcare professionals.

**Design/Setting:** A national (UK) research Priority Setting Partnership.

**Participants:** Patients: over 60 years of age who have experienced a fragility fracture of the lower limb or pelvis; carers involved in their care (both in and out of hospital); family and friends of patients; healthcare professionals involved in the treatment of these patients including but not limited to surgeons, anaesthetists, paramedics, nurses, general practitioners, physicians, physiotherapists, and occupational therapists.

**Methods:** Using established methodology in partnership with the James Lind Alliance over an 18-month period between August 2016 and January 2018, a national scoping survey asked respondents to submit their research uncertainties. These were then amalgamated into a smaller number of representative research questions. A search of the existing evidence was undertaken to ensure that the questions had not been answered. A second national survey was distributed asking respondents to prioritise the research questions. A final shortlist of 25 questions was taken to a multi-stakeholder workshop where a consensus was reached on the top 10 priorities.

**Results:** There were 963 original research uncertainties submitted by 365 respondents to the first survey. These original research uncertainties were refined into 88 representative research questions of which 76 were judged to be true uncertainties following a review of the current research evidence. Healthcare professionals and other stakeholders (patients, carers, friends and families) were represented equally in the respondents to both surveys. The top ten research questions represented uncertainties in rehabilitation, pain management, anaesthesia, and surgery.

**Conclusions:** We report the top 10 UK research priorities in patients with fragility fractures of the lower limb and pelvis derived by a Priority Setting Partnership with the James Lind Alliance.

## STRENGTHS AND LIMITATIONS OF THIS STUDY

- Use of established and transparent JLA methodology.
- Survey responses from all over the UK with a 50:50 split between healthcare professionals and non-healthcare professionals (patients, carers, family & friends).
- While the research priorities are now reported, it is up to the research community and research funding organisations to refine and deliver the answers to these questions.

### MORE INFORMATION

You can see the full list of original uncertainties and indicative research questions at the websites below, including out of scope questions:

JLA Website:

<http://www.jla.nihr.ac.uk/priority-setting-partnerships/broken-bones-in-older-people/>

NDORMS Website:

<https://www.ndorms.ox.ac.uk/research-groups/oxford-trauma/broken-bones-in-older-people>

### INTRODUCTION

Nine million new fragility fractures presented in the year 2000, with 50 million people worldwide suffering from the sequelae of these fractures.[1] Hip fractures alone are expected to rise from 1.31 million in 1990 to an estimated 6.26 million per year globally by 2050.[2] The associated treatment costs are around 2% of the total healthcare burden in the UK – approximately £3billion per year.[3]

Adults with fragility fractures of the lower limb or pelvis usually require treatment in hospital and often have other medical comorbidities, along with complex health and social care needs requiring intervention from a number of healthcare professionals and carers.

Research in the field of fragility fractures is usually driven by academics and pharmaceutical companies. There is evidence of a mismatch between the research priorities of patients and healthcare professionals and the research which is actually undertaken and delivered.[4-6] This situation is changing. Patient and public involvement (PPI) in research has flourished in the UK, driven by the National Institute of Health Research (NIHR) such that PPI involvement is now a key part of the design, conduct and delivery of research in health and social care.[7]

The James Lind Alliance (JLA) is a non-profit organisation hosted by the NIHR with the aim of raising awareness of research which is directly relevant and of potential benefit to patients and treating clinicians. The guiding principle is to bring together patients, carers, and clinicians to identify and agree on which research uncertainties are most important. To date, there have been over 50 priority setting partnerships across a range of disciplines with over 100 research topics addressed as a direct result of the JLA priority setting partnerships.[8,9]

The aim of this work is to establish the research priorities for adults with fragility fractures of the lower limb and pelvis, which represent the shared interests and priorities of patients, their families and friends, carers, and healthcare professionals.

### METHODS

The 'Broken Bones in Older People' priority setting partnership (PSP) took place over an 18-month period between August 2016 and January 2018. An overview of the methodology is shown in Figure 1.

#### Steering group & Partner Organisations

The clinical lead (MC) initiated the priority setting partnership and guided the appointment of a steering group to oversee and contribute to the process. The

1  
2  
3 steering group consisted of patient representatives, healthcare professionals, and  
4 carers with established links to relevant partner organisations (see Appendix 1) to  
5 ensure that a range of stakeholder groups were represented. A JLA Adviser (CW)  
6 supported and guided the PSP as a neutral facilitator to ensure that it was  
7 undertaken in a fair and transparent way with equal contribution from patients,  
8 carers and healthcare professionals. An information specialist (MF) managed the  
9 data and performed the analysis. This was overseen and advised on by the steering  
10 group.  
11

### 12 13 **Scope**

14 All research uncertainties related to fragility fractures of the lower limbs and pelvis  
15 for patients over 60 years of age. All stages of the patient pathway were eligible  
16 including the immediate care of fragility fractures by the emergency services, acute  
17 in-hospital care, and out-of-hospital care. Primary prevention strategies for fragility  
18 fractures were excluded.  
19

### 20 21 **Scoping Survey & Identification of Themes**

22 A national scoping survey asked respondents to submit their research uncertainties  
23 and provide some optional basic demographic information (gender, first three  
24 letters of their postcode, and to identify themselves as either a carer, patient,  
25 family/friend of someone over 60 years of age with a fragility fracture, or a  
26 healthcare professional). The survey was available in both paper and online formats  
27 (Bristol online survey tool)[10]. A pilot phase was undertaken to ensure acceptability  
28 to all stakeholder groups prior to launch. In addition to submissions from survey  
29 respondents, we included research uncertainties highlighted in relevant national  
30 guidelines published by The National Institute for Health and Care Excellence  
31 (NICE).[11,12]  
32

33 All original submissions were analysed using techniques common to qualitative  
34 thematic analysis to define themes and subthemes. The process included initial data  
35 immersion (reading and re-reading the submissions), coding of common  
36 ideas/themes, identification and naming of themes and subthemes, and a final  
37 review to refine the overarching themes. The Steering Group oversaw and advised  
38 on this work.  
39  
40

### 41 42 **Indicative Questions & Evidence Search**

43 The overarching themes and subthemes from the thematic analysis were used to  
44 generate a smaller number of representative research questions, so called 'indicative  
45 questions'. The indicative questions were reviewed by the steering group to ensure  
46 that they were a true representation of the original submissions, and to ensure that  
47 the language used was understandable to all stakeholder groups. For each indicative  
48 question, a review of the current research evidence was undertaken to ensure that  
49 the proposed indicative questions were 'true uncertainties' and had not already  
50 been answered by research. MF searched PubMed, the grey literature  
51 ([www.opengrey.eu](http://www.opengrey.eu)), The Cochrane Central Register of Controlled Trials (CENTRAL)  
52 ([www.cochranelibrary.com/about/central-landing-page.html](http://www.cochranelibrary.com/about/central-landing-page.html)), The WHO  
53 international Clinical Trials Registry Platform Search Portal  
54 (<http://www.who.int/ictrp/en>), Current Controlled trials  
55  
56  
57  
58  
59

1  
2  
3 (<http://www.controlledtrials.com/isrctn/>), the US National Institute of Health Trials  
4 Registry (<https://clinicaltrials.gov>), and published UK national guidelines.[11,12]  
5 Indicative questions were excluded if the steering group agreed that high quality  
6 evidence was found (e.g. large clinical trials either published or in-progress,  
7 published meta-analyses, or published national evidence based guidelines). The  
8 remaining indicative questions went through to interim prioritisation.  
9

### 10 11 **Interim Prioritisation Survey**

12 A second national survey asked respondents to state the importance of each  
13 indicative question on a five level Likert scale (1 not important, 2 low importance, 3  
14 no opinion, 4 high importance, 5 extremely important). The survey was available in  
15 paper and online formats and went through a pilot phase prior to launch. All  
16 indicative questions were ranked (interim prioritisation) by calculating a mean score  
17 per question based on the number of responses at each of the five response levels.  
18 The results were reviewed by the steering group who decided to take the top 25 to  
19 the final workshop.  
20  
21

### 22 **Final Workshop**

23 This was a one-day multi-stakeholder workshop involving patients, carers, and  
24 healthcare professionals. Participants worked in small groups to independently rank  
25 the top 25 indicative questions from the interim prioritisation process. The  
26 combined results of small group discussions were presented to the whole group.  
27 These were considered before a further round of small group discussions. Finally, the  
28 whole group came back together again to establish a consensus on the top 10  
29 research priorities for fragility fractures of the lower limb and pelvis.  
30  
31

### 32 **Patient & Public Involvement**

33 Patient and carer representatives were actively involved throughout the process;  
34 from the initial stages of planning and overseeing the study as part of the steering  
35 group, to participation in the final workshop to ensure that the patient and carer  
36 'voice' was represented in the final prioritisation. The steering group made particular  
37 efforts to approach a diverse range of patient and carer groups across a number of  
38 settings to encourage responses to the surveys. The dissemination strategy of this  
39 work includes a plain English summary alongside the scientific publication, which will  
40 be circulated to the partner organisations and PPI groups.  
41  
42  
43  
44  
45

## 46 **RESULTS**

47 Nine hundred and sixty-three research uncertainties were submitted by 365  
48 respondents to the first survey. After removal of 'out-of-scope' uncertainties, there  
49 were 810 remaining. Respondents were located throughout the UK (see Figure 2).  
50 Fifty-one percent (51%) of respondents identified themselves as healthcare  
51 professionals and 49% non-healthcare professionals (23% family and friends, 16%  
52 patients, 10% carers).  
53

54 Eleven themes were identified: pain, nutrition, surgery, medications & devices,  
55 anaesthesia, rehabilitation, falls, anxiety & depression, diagnosis, information, and  
56  
57  
58  
59



1  
2  
3 service delivery. From these themes 88 indicative questions were formulated to  
4 represent the original uncertainties. Twelve indicative questions were excluded  
5 following a search of the research evidence leaving 76 indicative questions for  
6 interim prioritisation.

7  
8 The interim prioritisation survey received 209 responses from different regions of  
9 the UK (Figure 3) of which 47% identified themselves as healthcare professionals and  
10 53% non-healthcare professionals (15% family & friends, 28% patients, 10% carers).  
11 Each question was scored based on the responses to interim prioritisation and  
12 ranked from positions 1 to 76. The ranking was reviewed by the steering group and  
13 the top 25 questions were taken to the final prioritisation workshop where a  
14 consensus was reached on the top 10 research priorities (see Box 1 for priorities 1-  
15 10 and Appendix 2 for priorities 11-25).

## 17 18 **DISCUSSION**

19 We have reported the results of a UK priority setting partnership with the James Lind  
20 Alliance and identified the top 10 research priorities in patients with fragility  
21 fractures of the lower limb and pelvis. These research priorities represent the shared  
22 interests of the multiple stakeholders affected by fragility fractures: patients, family  
23 & friends, carers, and healthcare professionals. The top 10 priorities emphasise the  
24 lack of evidence to guide 'rehabilitation' following fragility fracture and highlight a  
25 number of unanswered questions in postoperative physiotherapy, weight-bearing,  
26 as well as rehabilitation pathways for patients with cognitive impairment.

27  
28 This study has a number of strengths. Patient and carers were actively involved at all  
29 stages of the process to ensure that the patient voice was heard and remained at the  
30 centre of our efforts. We used the established and transparent JLA methodology to  
31 conduct this priority setting partnership. All the original research submissions, as  
32 well as the indicative questions (76 in total) are available on the JLA website.[8] The  
33 number of survey responses were comparable to other JLA priority setting  
34 partnerships,[13] and we achieved a 50:50 balance between responses from  
35 healthcare professionals and non-healthcare professionals. Responses were  
36 submitted from all over the UK and we are therefore confident that this work  
37 represents a national viewpoint.

38  
39 Fragility fractures affect frail older people disproportionately. Considerable efforts  
40 were required to ensure that all patient groups were able to access and respond to  
41 our national surveys. These strategies included accessing clinical environments (e.g.  
42 GP surgeries, hospital outpatient clinics) with paper surveys as well as sending our  
43 online survey link via the mailing lists of national organisations such as the National  
44 Osteoporosis Society to ensure as widespread inclusion of patient groups as  
45 possible. However, despite these efforts, it is possible that the research priorities  
46 reported still underrepresent the frailest group which includes those with  
47 permanent cognitive impairment for whom responding to a survey may not be  
48 possible. However, we are encouraged to see a research uncertainty in the top 10  
49 specifically directed towards identifying the key components of a rehabilitation  
50 pathway for those with chronic cognitive impairment.

51  
52 We found that research questions which were very specific - which identified the  
53 intervention and comparator within the question - tended to attract a lower ranking  
54 than more general questions asking a broader less well defined research question.  
55  
56  
57  
58  
59  
60



1  
2  
3 For example, questions asking ‘what is the best physiotherapy?’ were found to  
4 attract more votes than more specific questions comparing two specific  
5 interventions (e.g. ‘Which is better, tai chi or standard physiotherapy?’). This may  
6 reflect an opinion by survey respondents that broader questions may have wider  
7 impact and cover multiple interventions.

8 This work has highlighted the top research questions in lower limb and pelvic  
9 fragility fracture research. It is now up to the research community and research  
10 funders to refine and deliver the answers to these questions. We hope this work will  
11 shape the research landscape in this area and help to deliver meaningful advances in  
12 the quality-of-life and care of patients.  
13  
14

### 15 **ACKNOWLEDGEMENTS**

16 The authors wish to acknowledge the patients, their families and friends, carers, and  
17 healthcare professionals who submitted responses to the national surveys. In  
18 addition, we would like to thank the partner organisations (Appendix 1) who  
19 supported and promoted this work, the JLA for support and guidance throughout the  
20 process, and all attendees at the final workshop who worked tirelessly to achieve a  
21 consensus on the top 10 research questions: (Vicky Crawford, Anita Vowles, Robert  
22 Crouch, Andrew McAndrew, Nigel Rees, Helen Wilson, Pippa Ellery, Cliff Shelton,  
23 Debs Smith, Josephine Rowling, Karen Keates, Stella Saunders, Sheila Holmes, Jean  
24 Maston, Shirley MacWhirter, Thelma Sanders, Sue Bremner-Milne, Diane Hackford,  
25 John Cocker, Sheela Upadhyaya, and Toto Anne Gronlund).  
26  
27  
28

### 29 **AUTHOR CONTRIBUTIONS**

30 All authors have made substantial contributions to the design, implementation,  
31 analysis, and delivery of this research. All authors have read and approved the final  
32 version of this manuscript.  
33  
34

### 35 **FUNDING STATEMENT**

36 We would also like to acknowledge the British Orthopaedic Association and the UK  
37 Orthopaedic Trauma Society who made financial contributions to support the  
38 Priority Setting Partnership. The Partnership was supported by the National Institute  
39 for Health Research (NIHR) Oxford Biomedical Research Centre (BRC). The views  
40 expressed are those of the authors and not necessarily those of the NHS, the NIHR or  
41 the Department of Health.  
42  
43

### 44 **COMPETING INTERESTS**

45 MC is a member of the NIHR HTA General Board.  
46  
47

### 48 **DATA SHARING STATEMENT**

49 Supplementary data including all submitted original research uncertainties and out  
50 of scope submissions can be found on the JLA website at  
51 [http://www.jla.nihr.ac.uk/priority-setting-partnerships/broken-bones-in-older-  
52 people/](http://www.jla.nihr.ac.uk/priority-setting-partnerships/broken-bones-in-older-people/)  
53  
54  
55  
56  
57  
58  
59

**BOX 1 The top ten UK research priorities in fragility fractures of the lower limb and pelvis.**

- 1) What is the best physiotherapy and/or occupational therapy regime for adults during their in-hospital recovery from a fragility fracture of the lower limb?
- 2) What is the best physiotherapy and/or occupational therapy regime for adults during out-of-hospital recovery from a fragility fracture of the lower limb?
- 3) What is the best way to reduce harmful blood clots in adults treated with a plaster cast (or splint) for fragility fractures of the lower limb?
- 4) What information about recovery (e.g. rehabilitation, medication, exercises, nutrition, pain), and in what form, should be provided to patients and carers following a fragility fracture of the lower limb?
- 5) What is the best weight bearing regime following treatment (with or without surgery) for fragility fractures of the ankle?
- 6) What is most important to adults in their recovery from a fragility fracture of the lower limb?
- 7) What are the best treatments to prevent and treat confusion and delirium after surgery in adults with a fragility fracture of the lower limb?
- 8) What is the best pain relief, including non-drug therapies and alternatives to reduce morphine or opioid use, for adults with a lower limb fragility fracture during anaesthesia and immediate recovery after surgery?
- 9) What are the key components of a rehabilitation pathway for adults with dementia/cognitive impairment following a fragility fracture of the lower limb?
- 10) What is the best way to prevent surgical site infection in adults undergoing surgery for fragility fractures of the lower limb?

## REFERENCES

- 1 Johnell O, Kanis JA. An estimate of the worldwide prevalence and disability associated with osteoporotic fractures. *Osteoporos Int* 2006;**17**:1726–33. doi:10.1007/s00198-006-0172-4
- 2 Cooper C, Campion G, Melton LJ. Hip fractures in the elderly: a world-wide projection. *Osteoporos Int* 1992;**2**:285–9.
- 3 Johnell O, Kanis JA. An estimate of the worldwide prevalence, mortality and disability associated with hip fracture. *Osteoporos Int* 2004;**15**:897–902. doi:10.1007/s00198-004-1627-0
- 4 Crowe S, Fenton M, Hall M, *et al*. Patients', clinicians' and the research communities' priorities for treatment research: there is an important mismatch. *Res Involv Engagem* 2015;**1**:2. doi:10.1186/s40900-015-0003-x
- 5 Tallon D, Chard J, Dieppe P. Relation between agendas of the research community and the research consumer. *Lancet* 2000;**355**:2037–40. doi:10.1016/S0140-6736(00)02351-5
- 6 Boddy K, Cowan K, Gibson A, *et al*. Does funded research reflect the priorities of people living with type 1 diabetes? A secondary analysis of research questions. *BMJ Open* 2017;**7**:e016540. doi:10.1136/bmjopen-2017-016540
- 7 *National Institute for Health. Going the extra mile: improving the nation's health and wellbeing through public involvement in research. 2015.* <https://www.nihr.ac.uk/about-us/documents/Extra%20Mile2.pdf> (accessed 9 Sep2017).
- 8 *James Lind Alliance Priority Setting Partnerships. 2017.* <http://www.jla.nihr.ac.uk> (accessed 9 Sep2017).
- 9 Boney O, Bell M, Bell N, *et al*. Identifying research priorities in anaesthesia and perioperative care: final report of the joint National Institute of Academic Anaesthesia/James Lind Alliance Research Priority Setting Partnership. 2015. e010006. doi:10.1136/bmjopen-2015-010006
- 10 *Bristol Online Survey.* <http://www.onlinesurveys.ac.uk> (accessed 1 Mar2018).
- 11 No authors listed. Hip fracture: Management. *NICE* 2017.
- 12 Fractures (non-complex): assessment and management (NG38), NICE. 2016.
- 13 Rangan A, Upadhaya S, Regan S, *et al*. Research priorities for shoulder

1  
2  
3 surgery: results of the 2015 James Lind Alliance patient and clinician  
4 priority setting partnership. *BMJ Open* 2016;**6**:e010412.  
5 doi:10.1136/bmjopen-2015-010412  
6  
7  
8  
9  
10  
11  
12  
13  
14  
15  
16  
17  
18  
19  
20  
21  
22  
23  
24  
25  
26  
27  
28  
29  
30  
31  
32  
33  
34  
35  
36  
37  
38  
39  
40  
41  
42  
43  
44  
45  
46  
47  
48  
49  
50  
51  
52  
53  
54  
55  
56  
57  
58  
59  
60

For peer review only

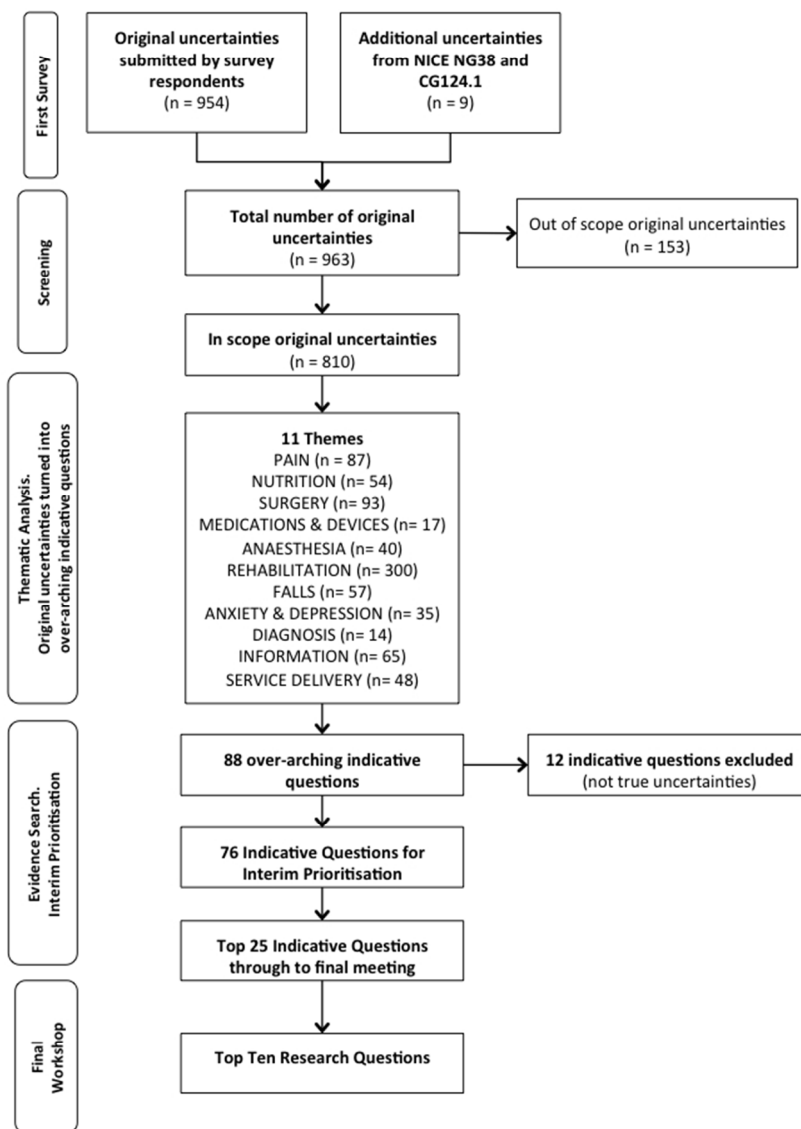

Figure 1. Flow Chart of Priority Setting Partnership Process

254x338mm (72 x 72 DPI)

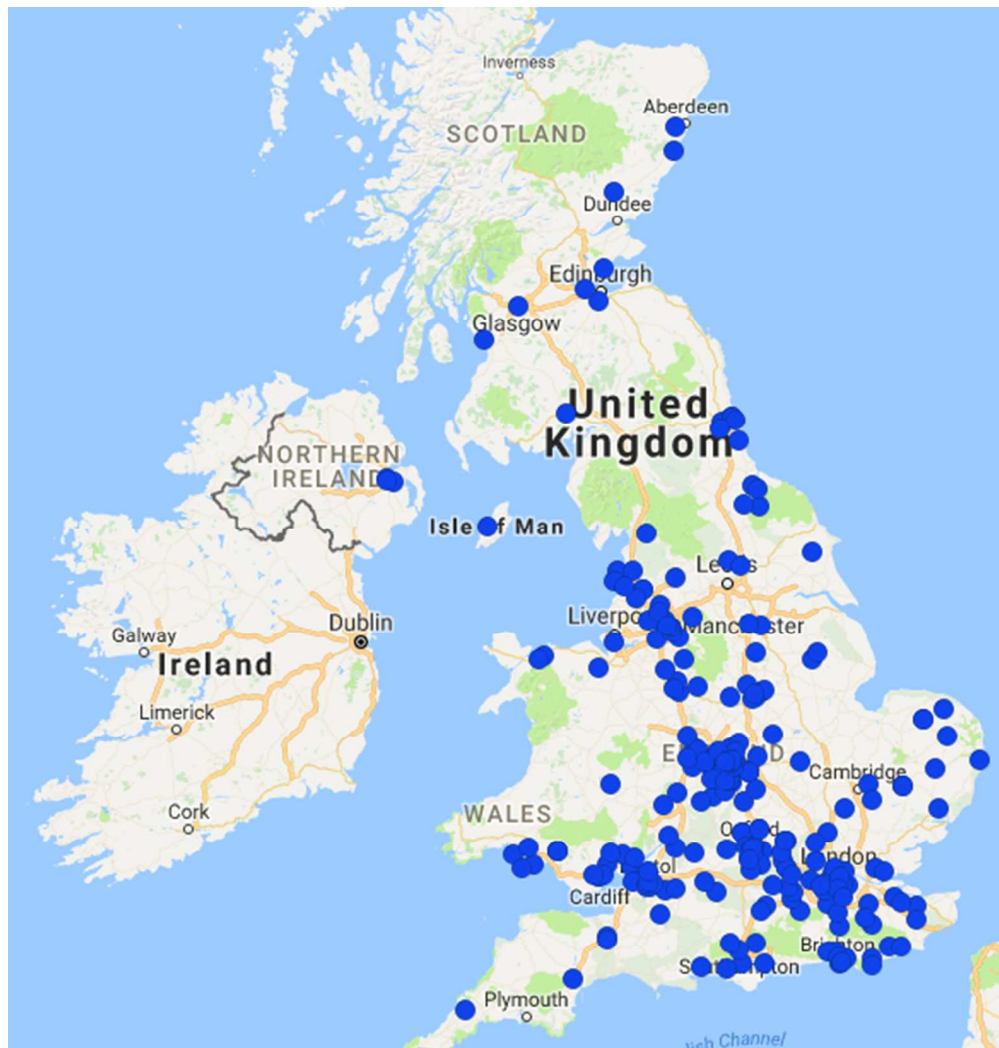

Figure 2. Maps showing geographical distribution of survey responses for first scoping survey (blue dots)  
206x215mm (72 x 72 DPI)

1  
2  
3  
4  
5  
6  
7  
8  
9  
10  
11  
12  
13  
14  
15  
16  
17  
18  
19  
20  
21  
22  
23  
24  
25  
26  
27  
28  
29  
30  
31  
32  
33  
34  
35  
36  
37  
38  
39  
40  
41  
42  
43  
44  
45  
46  
47  
48  
49  
50  
51  
52  
53  
54  
55  
56  
57  
58  
59  
60

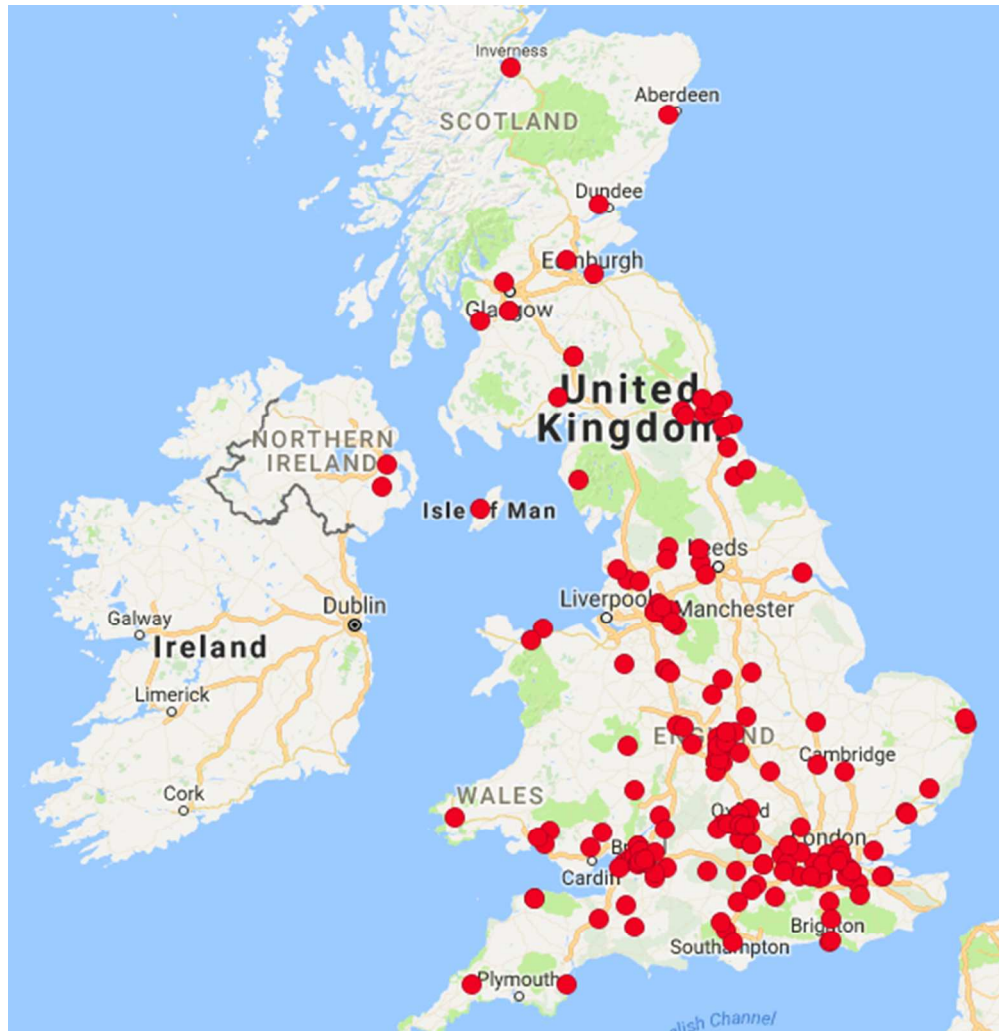

Figure 3. Maps showing geographical distribution of survey responses for interim prioritisation survey (red dots)

208x214mm (72 x 72 DPI)



## APPENDIX 1: PARTNER ORGANISATIONS

### ***Charity Organisations***

Carers UK  
National Care Association  
University of the Third Age (U3A)  
Association of Directors of Adult Social Services (ADASS)  
National Osteoporosis Society (NOS)  
Age Cymru  
Age Scotland  
Age UK  
Association of Medical Charities  
Involve People in research  
St Johns Ambulance  
Arthritis Research UK

### ***Personal Contacts***

AGILE (physios specializing in care of older adults)  
Dr Anglea McCullagh  
Coventry & Warwickshire Partnership Trust  
National Institute for Health Research. Collaboration for Leadership in Applied Health Research and Care. West Midlands (NIHR CLAHRC WM)  
Manor Court Surgery, Nuneaton

### ***Professional Organisations***

University/User Teaching and Research Action Partnership (UNTRAP)  
Warwickshire Carers Association & Guideposts  
Association of Trauma and Orthopaedic Chartered Physiotherapists (ATOCP)  
The Chartered Society of Physiotherapy (CSP)  
Age and Ageing  
National Osteoporosis Guideline Group (NOGG)  
National Hip Fracture Database (NHFD)  
Orthopaedic Trauma Society (OTS)  
Royal College of Emergency Medicine (RCEM)  
The National Ambulance Research Steering Group (NARSG)  
Cardiff and Vale Orthopaedic Centre (CAVOC)  
Community Health Councils in Wales  
Health and Care Research Wales  
Health and Care Research Wales Support Centre  
Health Services Research Unit – Scotland  
Healthwatch England  
Royal British Legion working with veterans  
Research User Group (RUG) NIHR Manchester  
The RNHA Registered Nursing Home Association  
Welsh Arthritis Research Network  
Age Anaesthesia Association (AAA)  
British Geriatric Society

1  
2  
3 Association of Anaesthetists of Great Britain and Ireland  
4 Hip Fracture Perioperative Network (HipPeN)  
5 National Institute of Academic Anaesthesia  
6 Royal College Anaesthetists  
7 British Orthopaedic Association (BOA)  
8 Falls and Fragility Fracture Audit Project (FFFAP)  
9 Society of Trauma Nurses (SOTN)  
10 Trauma Audit & Research Network (TARN)  
11 Cochrane  
12 Contact, Help, Advice and Information (CHAIN) Network  
13 PAIR  
14  
15  
16  
17  
18

## 19 **APPENDIX 2: RESEARCH PRIORITIES 11-25**

20  
21  
22 11) How can we improve the way we link services and the effectiveness of  
23 rehabilitation when patients transition from one environment to another (e.g. from  
24 hospital to home) following a lower limb fragility fracture?  
25

26 12) What is the best pain relief, including non-drug therapies and alternatives to  
27 reduce morphine or opioid use, for adults with a lower limb fragility fracture on  
28 arrival in hospital (in the emergency department or ward)?  
29

30  
31 13) What is the best weight bearing regime following treatment (with or without  
32 surgery) for fragility fractures of the pelvis and acetabulum (hip socket)?  
33

34  
35 14) What is the best method to assess pain in adults with and without confusion  
36 (either short term or long term such as dementia) following a lower limb fragility  
37 fracture?  
38

39  
40 15) What are the important parts of an enhanced recovery pathway (such as early  
41 mobilisation) for adults with a fragility fracture of the lower limb?  
42

43 16) What is the best pain relief, including non-drug therapies and alternatives to  
44 reduce morphine or opioid use, for adults with a lower limb fragility fracture upon  
45 discharge from hospital?  
46

47  
48 17) What is the best way to reduce harmful blood clots in adults with a fragility hip  
49 fracture?  
50

51  
52 18) What is the best intervention/method to enable and support early discharge of  
53 patients from hospital with a lower limb fragility fracture?  
54

55  
56 19) What is the best weight bearing regime following treatment (with or without  
57 surgery) for fragility fractures of the tibial plateau (the top of the shin bone which  
58 forms part of the knee joint)?  
59  
60

1  
2  
3 20) What are the best physical therapies to treat adults with a fear of falling after a  
4 lower limb fragility fracture?  
5

6  
7 21) What is the best pain relief, including non-drug therapies and alternatives to  
8 reduce morphine or opioid use, for adults with a lower limb fragility fracture during  
9 in-hospital rehabilitation?  
10

11  
12 22) What are the best psychological therapies to treat adults with a fear of falling  
13 after a lower limb fragility fracture?  
14

15 23) What are the specific barriers to hospital discharge (factors which delay or  
16 prevent discharge from hospital) for adults with a fragility fracture of the lower limb?  
17

18  
19 24) What is the best way to promote healing in adults with a fragility fracture of the  
20 lower limb?  
21

22  
23 25) What is the best treatment for surgical infections in adults following surgery for  
24 fragility fractures of the lower limb?  
25  
26  
27  
28  
29  
30  
31  
32  
33  
34  
35  
36  
37  
38  
39  
40  
41  
42  
43  
44  
45  
46  
47  
48  
49  
50  
51  
52  
53  
54  
55  
56  
57  
58  
59  
60

# BMJ Open

## Research Priorities in Fragility Fractures of the Lower Limb and Pelvis: A UK Priority Setting Partnership with the James Lind Alliance

|                                 |                                                                                                                                                                                                                                                                                                                                                                                                                                                                                                                                                                                                                                                                                                                                                                                                                                                                                                                                                                                                                                                                                                                                                                                                                                                                                    |
|---------------------------------|------------------------------------------------------------------------------------------------------------------------------------------------------------------------------------------------------------------------------------------------------------------------------------------------------------------------------------------------------------------------------------------------------------------------------------------------------------------------------------------------------------------------------------------------------------------------------------------------------------------------------------------------------------------------------------------------------------------------------------------------------------------------------------------------------------------------------------------------------------------------------------------------------------------------------------------------------------------------------------------------------------------------------------------------------------------------------------------------------------------------------------------------------------------------------------------------------------------------------------------------------------------------------------|
| Journal:                        | <i>BMJ Open</i>                                                                                                                                                                                                                                                                                                                                                                                                                                                                                                                                                                                                                                                                                                                                                                                                                                                                                                                                                                                                                                                                                                                                                                                                                                                                    |
| Manuscript ID                   | bmjopen-2018-023301.R1                                                                                                                                                                                                                                                                                                                                                                                                                                                                                                                                                                                                                                                                                                                                                                                                                                                                                                                                                                                                                                                                                                                                                                                                                                                             |
| Article Type:                   | Research                                                                                                                                                                                                                                                                                                                                                                                                                                                                                                                                                                                                                                                                                                                                                                                                                                                                                                                                                                                                                                                                                                                                                                                                                                                                           |
| Date Submitted by the Author:   | 11-Jul-2018                                                                                                                                                                                                                                                                                                                                                                                                                                                                                                                                                                                                                                                                                                                                                                                                                                                                                                                                                                                                                                                                                                                                                                                                                                                                        |
| Complete List of Authors:       | <p>Fernandez, Miguel; University of Oxford Nuffield Department of Orthopaedics Rheumatology and Musculoskeletal Sciences, Oxford Trauma; University Hospitals Coventry and Warwickshire NHS Trust, Trauma &amp; Orthopaedic Surgery</p> <p>Arnel, Laura; University of Oxford Nuffield Department of Orthopaedics Rheumatology and Musculoskeletal Sciences, Oxford Trauma</p> <p>Gould, Jenny; Patient representative</p> <p>McGibbon, Alwin; Patient representative</p> <p>Grant, Richard; Patient representative</p> <p>Bell, Philip; Patient representative</p> <p>White, Stuart; Royal Sussex County Hospital</p> <p>Baxter, Mark; University Hospital Southampton NHS Foundation Trust</p> <p>Griffin, Xavier; University of Oxford Nuffield Department of Orthopaedics Rheumatology and Musculoskeletal Sciences, Kadoorie Centre</p> <p>Chesser, Tim; North Bristol NHS Trust, Trauma &amp; Orthopaedics</p> <p>Keene, David; University of Oxford Nuffield Department of Orthopaedics Rheumatology and Musculoskeletal Sciences, Oxford Trauma</p> <p>Kearney, R.S.; University of Warwick,</p> <p>White, Catherine; James Lind Alliance</p> <p>Costa, Matthew; University of Oxford, Nuffield Department of Orthopaedics, Rheumatology, and Musculoskeletal Sciences</p> |
| <b>Primary Subject Heading</b>: | Qualitative research                                                                                                                                                                                                                                                                                                                                                                                                                                                                                                                                                                                                                                                                                                                                                                                                                                                                                                                                                                                                                                                                                                                                                                                                                                                               |
| Secondary Subject Heading:      | Surgery, Qualitative research                                                                                                                                                                                                                                                                                                                                                                                                                                                                                                                                                                                                                                                                                                                                                                                                                                                                                                                                                                                                                                                                                                                                                                                                                                                      |
| Keywords:                       | Adult orthopaedics < ORTHOPAEDIC & TRAUMA SURGERY, Musculoskeletal disorders < ORTHOPAEDIC & TRAUMA SURGERY, Hip < ORTHOPAEDIC & TRAUMA SURGERY, fragility fractures                                                                                                                                                                                                                                                                                                                                                                                                                                                                                                                                                                                                                                                                                                                                                                                                                                                                                                                                                                                                                                                                                                               |
|                                 |                                                                                                                                                                                                                                                                                                                                                                                                                                                                                                                                                                                                                                                                                                                                                                                                                                                                                                                                                                                                                                                                                                                                                                                                                                                                                    |

SCHOLARONE™  
Manuscripts

1  
2  
3 **Research Priorities in Fragility Fractures of the Lower Limb and Pelvis: A UK Priority**  
4 **Setting Partnership with the James Lind Alliance.**  
5

6 M. A. Fernandez<sup>1,2\*</sup>, L. Arnel<sup>1</sup>, J. Gould<sup>3</sup>, A. McGibbon<sup>3</sup>, R. Grant<sup>3</sup>, P. Bell<sup>3</sup>, S. White<sup>4</sup>,  
7 M. Baxter<sup>5</sup>, X. L. Griffin<sup>1</sup>, T. J. S. Chesser<sup>6</sup>, D. J. Keene<sup>1</sup>, R. Kearney<sup>7</sup>, C. White<sup>8</sup>, and M.  
8 L. Costa<sup>1</sup>  
9

10  
11  
12 <sup>1</sup>Oxford Trauma, University of Oxford, Kadoorie Centre, John Radcliffe Hospital,  
13 Headley Way, Oxford OX3 9DU, UK  
14

15 <sup>2</sup>University Hospitals Coventry & Warwickshire NHS Trust, Clifford Bridge Road,  
16 Coventry, CV2 2DX, UK  
17

18 <sup>3</sup> Patient representatives, UK  
19

20 <sup>4</sup>Royal Sussex County Hospital, Brighton, BN2 5BE, UK  
21

22 <sup>5</sup>University Hospital Southampton NHS Foundation Trust, Tremona Road,  
23 Southampton, SO16 6YD, UK  
24

25 <sup>6</sup>North Bristol NHS Trust, Southmead Hospital, Bristol BS10 5NB, UK  
26

27 <sup>7</sup>University of Warwick, Clinical Trials Unit, Gibbet Hill Road, Coventry, CV4 7AL, UK  
28

29 <sup>8</sup>James Lind Alliance advisor (to Feb 2018), National Institute for Health Research,  
30 University of Southampton, Enterprise Road, Southampton, SO16 7NS, UK  
31

32 \*corresponding author: Mr M. A. Fernandez, Oxford Trauma, University of Oxford,  
33 Kadoorie Centre, John Radcliffe Hospital, Headley Way, Oxford OX3 9DU, UK.  
34 [miguel.fernandez@ndorms.ox.ac.uk](mailto:miguel.fernandez@ndorms.ox.ac.uk) Tel. 07939250006  
35

36  
37  
38  
39  
40  
41 **Keywords:** Adult orthopaedics, fragility fractures, lower limb, priority setting  
42 partnership  
43

44 **Word count:** 2860  
45  
46  
47  
48  
49  
50  
51  
52  
53  
54  
55  
56  
57  
58  
59  
60

## ABSTRACT

**Objective:** To determine research priorities in fragility fractures of the lower limb and pelvis, which represent the shared priorities of patients, their friends and families, carers, and healthcare professionals.

**Design/Setting:** A national (UK) research Priority Setting Partnership.

**Participants:** Patients: over 60 years of age who have experienced a fragility fracture of the lower limb or pelvis; carers involved in their care (both in and out of hospital); family and friends of patients; healthcare professionals involved in the treatment of these patients including but not limited to surgeons, anaesthetists, paramedics, nurses, general practitioners, physicians, physiotherapists, and occupational therapists.

**Methods:** Using a multi-phase methodology in partnership with the James Lind Alliance over 18-months (August 2016 - January 2018), a national scoping survey asked respondents to submit their research uncertainties. These were amalgamated into a smaller number of research questions. The existing evidence was searched to ensure that the questions had not been answered. A second national survey asked respondents to prioritise the research questions. A final shortlist of 25 questions was taken to a multi-stakeholder workshop where a consensus was reached on the top 10 priorities.

**Results:** There were 963 original uncertainties submitted by 365 respondents to the first survey. These original uncertainties were refined into 88 research questions of which 76 were judged to be true uncertainties following a review of the research evidence. Healthcare professionals and other stakeholders (patients, carers, friends and families) were represented equally in the responses. The top ten represent uncertainties in rehabilitation, pain management, anaesthesia, and surgery.

**Conclusions:** We report the top 10 UK research priorities in patients with fragility fractures of the lower limb and pelvis. The priorities highlight uncertainties in rehabilitation, postoperative physiotherapy, pain, weight bearing, infection, and thromboprophylaxis. The challenge now is to refine and deliver answers to these research priorities.

## STRENGTHS AND LIMITATIONS OF THIS STUDY

- Use of established and transparent James Lind Alliance methodology.
- Survey responses from all over the UK with a 50:50 split between healthcare professionals and non-healthcare professionals (patients, carers, family & friends).
- While the research priorities are now reported, it is up to the research community and research funding organisations to refine and deliver the answers to these questions.

## INTRODUCTION

An estimated nine million fragility fractures occurred worldwide in the year 2000, with 50 million people suffering from the sequelae of these fractures.[1] Hip fractures alone are expected to rise from 1.31 million in 1990 to an estimated 6.26 million per year globally by 2050.[2] In the UK over 300,000 patients present to hospital with fragility fractures[3] and the associated treatment costs are around 2% of the total healthcare burden in the UK – approximately £3billion per year.[4]

Adults with fragility fractures of the lower limb or pelvis usually require treatment in hospital and often have other medical comorbidities, along with complex health and social care needs requiring intervention from a number of healthcare professionals and carers.

There is evidence of a mismatch between the research priorities of patients and healthcare professionals and the research which is actually undertaken and delivered.[5-7] This situation is changing. Patient and public involvement (PPI) in research has flourished in the UK, driven by the National Institute of Health Research (NIHR) such that PPI involvement is now a key part of the design, conduct and delivery of research in health and social care.[8]

The James Lind Alliance (JLA) is a non-profit organisation hosted by the NIHR with the aim of raising awareness of research which is directly relevant and of potential benefit to patients and treating clinicians. The guiding principle is to bring together patients, carers, and clinicians to identify and agree on which research uncertainties are most important. To date, there have been over 50 priority setting partnerships across a range of disciplines with over 100 research topics addressed as a direct result of the JLA priority setting partnerships.[9,10]

The aim of this work is to establish the research priorities for adults with fragility fractures of the lower limb and pelvis, which represent the shared interests and priorities of patients, their families and friends, carers, and healthcare professionals.

## METHODS

The 'Broken Bones in Older People' priority setting partnership (PSP) took place over an 18-month period between August 2016 and January 2018. An overview of the methodology is shown in Figure 1.

### Steering group & Partner Organisations

The clinical lead (MC) initiated the priority setting partnership and guided the appointment of a steering group to oversee and contribute to the process. The steering group consisted of patient representatives, healthcare professionals, and carers with established links to relevant partner organisations (see Appendix 1) to ensure that a range of stakeholder groups were represented. Steering group members did so on a voluntary basis and were expected to commit to the whole process where possible. A JLA Adviser (CW) supported and guided the PSP as a neutral facilitator to ensure that it was undertaken in a fair and transparent way with equal contribution from patients, carers and healthcare professionals. This is an important aspect of the JLA process and ensures that all voices are heard and respected throughout the process. An information specialist (MF) managed the data and performed the analysis. This was overseen and advised on by the steering group.



## Scope

All research uncertainties related to fragility fractures of the lower limbs and pelvis for patients over 60 years of age were considered in scope. All stages of the patient pathway were eligible including the immediate care of fragility fractures by the emergency services, acute in-hospital care, and out-of-hospital care. Primary prevention strategies for fragility fractures were excluded. The decisions about whether submissions were in or out-of-scope were made by the information specialist and subsequently verified by the steering group.

## Scoping Survey & Identification of Themes

A national scoping survey asked respondents to submit their research uncertainties and provide some optional basic demographic information (gender, first three letters of their postcode, and to identify themselves as either a carer, patient, family/friend of someone over 60 years of age with a fragility fracture, or a healthcare professional). The survey was circulated via the steering group and their partner organisations as an open invitation. The survey was available in both paper and online formats (Bristol online survey tool)[11]. A pilot phase was undertaken to ensure that the survey was clearly written, understandable to all groups, and easy to complete. In addition to submissions from survey respondents, we included research uncertainties highlighted in relevant national guidelines published by The National Institute for Health and Care Excellence (NICE).[12,13] This work did not require formal ethical approval. Respondents to the surveys gave written consent to the inclusion of their anonymised data in this process.

All original submissions were analysed using techniques common to qualitative thematic analysis to define themes and subthemes. The process included initial data immersion (reading and re-reading the submissions), coding of common ideas/themes, identification and naming of themes and subthemes, and a final review to refine the overarching themes. The thematic analysis was undertaken by the information specialist and decisions verified by the steering group.

## Indicative Questions & Evidence Search

The overarching themes and subthemes from the thematic analysis were used to generate a smaller number of representative research questions, so called 'indicative questions'. These were derived from the original submissions and were designed to summarise the submissions within each subtheme/theme. The information specialist undertook this process. The indicative questions were then reviewed by the steering group along with a selection of the original uncertainties to ensure that they were a true representation, and to ensure that the language used was understandable to all stakeholder groups. For each indicative question, a review of the current research evidence was undertaken to ensure that the proposed indicative questions were 'true uncertainties' and had not already been answered by research. MF searched PubMed, the grey literature ([www.opengrey.eu](http://www.opengrey.eu)), The Cochrane Central Register of Controlled Trials (CENTRAL) ([www.cochranelibrary.com/about/central-landing-page.html](http://www.cochranelibrary.com/about/central-landing-page.html)), The WHO international Clinical Trials Registry Platform Search Portal (<http://www.who.int/ictrp/en>), Current Controlled trials (<http://www.controlledtrials.com/isrctn/>), the US National Institute of Health Trials

1  
2  
3 Registry (<https://clinicaltrials.gov>), and published UK national guidelines.[12,13]  
4 Indicative questions were excluded if the steering group agreed that high quality  
5 evidence was found (e.g. large clinical trials either published or in-progress,  
6 published meta-analyses, or published national evidence based guidelines). The  
7 remaining indicative questions went through to interim prioritisation.  
8

### 9 10 **Interim Prioritisation Survey**

11 A second national survey asked respondents to state the importance of each  
12 indicative question on a five level Likert scale (1 not important, 2 low importance, 3  
13 no opinion, 4 high importance, 5 extremely important). The survey was available in  
14 paper and online formats and went through a pilot phase prior to launch. The  
15 second survey was again circulated as an open invitation and not restricted to  
16 respondents from the first survey. All indicative questions were ranked (interim  
17 prioritisation) by calculating a mean score per question based on the number of  
18 responses at each of the five response levels. The results were reviewed by the  
19 steering group who decided to take the top 25 to the final workshop.  
20  
21

### 22 **Final Workshop**

23 This was a one-day multi-stakeholder workshop involving patients, carers, and  
24 healthcare professionals. Participants worked in small groups to independently rank  
25 the top 25 indicative questions from the interim prioritisation process. The  
26 combined results of small group discussions were presented to the whole group.  
27 These were considered before a further round of small group discussions. Finally, the  
28 whole group came back together again to establish a consensus on the top 10  
29 research priorities for fragility fractures of the lower limb and pelvis. The role of the  
30 steering group at this stage was to ensure that patients and carers were well  
31 supported with information and with practical support on the day. As places in the  
32 final workshop were limited, the majority of the steering group did not participate in  
33 the final workshop.  
34  
35  
36

### 37 **Patient & Public Involvement**

38 Patient and carer representatives were actively involved throughout the process;  
39 from the initial stages of planning and overseeing the study as part of the steering  
40 group, to participation in the final workshop to ensure that the patient and carer  
41 'voice' was represented in the final prioritisation. The steering group made particular  
42 efforts to approach a diverse range of patient and carer groups across a number of  
43 settings to encourage responses to the surveys. The dissemination strategy of this  
44 work includes a plain English summary alongside the scientific publication, which will  
45 be circulated to the partner organisations and PPI groups.  
46  
47  
48  
49  
50

## 51 **RESULTS**

52 Nine hundred and sixty-three research uncertainties were submitted by 365  
53 respondents to the first survey. After removal of 'out-of-scope' uncertainties, there  
54 were 810 remaining. Respondents were located throughout the UK. Fifty-one  
55 percent (51%) of respondents identified themselves as healthcare professionals and  
56  
57  
58  
59  
60

1  
2  
3 49% non-healthcare professionals (23% family and friends, 16% patients, 10%  
4 carers).

5 Eleven themes were identified: pain, nutrition, surgery, medications & devices,  
6 anaesthesia, rehabilitation, falls, anxiety & depression, diagnosis, information, and  
7 service delivery. From these themes 88 indicative questions were formulated to  
8 represent the original uncertainties. Twelve indicative questions were excluded  
9 following a search of the research evidence leaving 76 indicative questions for  
10 interim prioritisation.

11  
12 The interim prioritisation survey received 209 responses from different regions of  
13 the UK of which 47% identified themselves as healthcare professionals and 53% non-  
14 healthcare professionals (15% family & friends, 28% patients, 10% carers). Each  
15 question was scored based on the responses to interim prioritisation and ranked  
16 from positions 1 to 76. The ranking was reviewed by the steering group and the top  
17 25 questions were taken to the final prioritisation workshop where a consensus was  
18 reached on the top 10 research priorities (see Figure 2 for priorities 1-10 and  
19 Appendix 2 for priorities 11-25). You can see the full list of original uncertainties and  
20 indicative research questions at the following websites:

21  
22 [www.jla.nihr.ac.uk/priority-setting-partnerships/broken-bones-in-older-people/](http://www.jla.nihr.ac.uk/priority-setting-partnerships/broken-bones-in-older-people/)  
23 [www.ndorms.ox.ac.uk/research-groups/oxford-trauma/broken-bones-in-older-  
24 people](http://www.ndorms.ox.ac.uk/research-groups/oxford-trauma/broken-bones-in-older-people)  
25  
26  
27

## 28 **DISCUSSION**

29 We have reported the results of a UK priority setting partnership with the James Lind  
30 Alliance and identified the top 10 research priorities in patients with fragility  
31 fractures of the lower limb and pelvis. These research priorities represent the shared  
32 interests of the multiple stakeholders affected by fragility fractures: patients, family  
33 & friends, carers, and healthcare professionals. The top 10 priorities emphasise the  
34 lack of evidence to guide 'rehabilitation' following fragility fracture and highlight a  
35 number of unanswered questions in postoperative physiotherapy, weight-bearing,  
36 as well as rehabilitation pathways for patients with cognitive impairment.

37  
38 This study has a number of strengths. This is the first study to report national  
39 research priorities in fragility fractures of the lower limb and pelvis in partnership  
40 with the James Lind Alliance. These priorities compliment research priorities  
41 highlighted by national guidelines in this area which also highlight research  
42 uncertainties in rehabilitation and physiotherapy.[12] Patient and carers were  
43 actively involved at all stages of the process to ensure that the patient voice was  
44 heard and remained at the centre of our efforts. We used the established and  
45 transparent JLA methodology to conduct this priority setting partnership. All the  
46 original research submissions, as well as the indicative questions (76 in total) are  
47 available on the JLA website.[9] The number of survey responses were comparable  
48 to other JLA priority setting partnerships,[14] and we achieved a 50:50 balance  
49 between responses from healthcare professionals and non-healthcare professionals.  
50 Responses were submitted from all over the UK and we are therefore confident that  
51 this work represents a national viewpoint.

52  
53  
54  
55  
56  
57  
58  
59  
60  
61  
62  
63  
64  
65  
66  
67  
68  
69  
70  
71  
72  
73  
74  
75  
76  
77  
78  
79  
80  
81  
82  
83  
84  
85  
86  
87  
88  
89  
90  
91  
92  
93  
94  
95  
96  
97  
98  
99  
100  
101  
102  
103  
104  
105  
106  
107  
108  
109  
110  
111  
112  
113  
114  
115  
116  
117  
118  
119  
120  
121  
122  
123  
124  
125  
126  
127  
128  
129  
130  
131  
132  
133  
134  
135  
136  
137  
138  
139  
140  
141  
142  
143  
144  
145  
146  
147  
148  
149  
150  
151  
152  
153  
154  
155  
156  
157  
158  
159  
160  
161  
162  
163  
164  
165  
166  
167  
168  
169  
170  
171  
172  
173  
174  
175  
176  
177  
178  
179  
180  
181  
182  
183  
184  
185  
186  
187  
188  
189  
190  
191  
192  
193  
194  
195  
196  
197  
198  
199  
200  
201  
202  
203  
204  
205  
206  
207  
208  
209  
210  
211  
212  
213  
214  
215  
216  
217  
218  
219  
220  
221  
222  
223  
224  
225  
226  
227  
228  
229  
230  
231  
232  
233  
234  
235  
236  
237  
238  
239  
240  
241  
242  
243  
244  
245  
246  
247  
248  
249  
250  
251  
252  
253  
254  
255  
256  
257  
258  
259  
260  
261  
262  
263  
264  
265  
266  
267  
268  
269  
270  
271  
272  
273  
274  
275  
276  
277  
278  
279  
280  
281  
282  
283  
284  
285  
286  
287  
288  
289  
290  
291  
292  
293  
294  
295  
296  
297  
298  
299  
300  
301  
302  
303  
304  
305  
306  
307  
308  
309  
310  
311  
312  
313  
314  
315  
316  
317  
318  
319  
320  
321  
322  
323  
324  
325  
326  
327  
328  
329  
330  
331  
332  
333  
334  
335  
336  
337  
338  
339  
340  
341  
342  
343  
344  
345  
346  
347  
348  
349  
350  
351  
352  
353  
354  
355  
356  
357  
358  
359  
360  
361  
362  
363  
364  
365  
366  
367  
368  
369  
370  
371  
372  
373  
374  
375  
376  
377  
378  
379  
380  
381  
382  
383  
384  
385  
386  
387  
388  
389  
390  
391  
392  
393  
394  
395  
396  
397  
398  
399  
400  
401  
402  
403  
404  
405  
406  
407  
408  
409  
410  
411  
412  
413  
414  
415  
416  
417  
418  
419  
420  
421  
422  
423  
424  
425  
426  
427  
428  
429  
430  
431  
432  
433  
434  
435  
436  
437  
438  
439  
440  
441  
442  
443  
444  
445  
446  
447  
448  
449  
450  
451  
452  
453  
454  
455  
456  
457  
458  
459  
460  
461  
462  
463  
464  
465  
466  
467  
468  
469  
470  
471  
472  
473  
474  
475  
476  
477  
478  
479  
480  
481  
482  
483  
484  
485  
486  
487  
488  
489  
490  
491  
492  
493  
494  
495  
496  
497  
498  
499  
500  
501  
502  
503  
504  
505  
506  
507  
508  
509  
510  
511  
512  
513  
514  
515  
516  
517  
518  
519  
520  
521  
522  
523  
524  
525  
526  
527  
528  
529  
530  
531  
532  
533  
534  
535  
536  
537  
538  
539  
540  
541  
542  
543  
544  
545  
546  
547  
548  
549  
550  
551  
552  
553  
554  
555  
556  
557  
558  
559  
560  
561  
562  
563  
564  
565  
566  
567  
568  
569  
570  
571  
572  
573  
574  
575  
576  
577  
578  
579  
580  
581  
582  
583  
584  
585  
586  
587  
588  
589  
590  
591  
592  
593  
594  
595  
596  
597  
598  
599  
600  
601  
602  
603  
604  
605  
606  
607  
608  
609  
610  
611  
612  
613  
614  
615  
616  
617  
618  
619  
620  
621  
622  
623  
624  
625  
626  
627  
628  
629  
630  
631  
632  
633  
634  
635  
636  
637  
638  
639  
640  
641  
642  
643  
644  
645  
646  
647  
648  
649  
650  
651  
652  
653  
654  
655  
656  
657  
658  
659  
660  
661  
662  
663  
664  
665  
666  
667  
668  
669  
670  
671  
672  
673  
674  
675  
676  
677  
678  
679  
680  
681  
682  
683  
684  
685  
686  
687  
688  
689  
690  
691  
692  
693  
694  
695  
696  
697  
698  
699  
700  
701  
702  
703  
704  
705  
706  
707  
708  
709  
710  
711  
712  
713  
714  
715  
716  
717  
718  
719  
720  
721  
722  
723  
724  
725  
726  
727  
728  
729  
730  
731  
732  
733  
734  
735  
736  
737  
738  
739  
740  
741  
742  
743  
744  
745  
746  
747  
748  
749  
750  
751  
752  
753  
754  
755  
756  
757  
758  
759  
760  
761  
762  
763  
764  
765  
766  
767  
768  
769  
770  
771  
772  
773  
774  
775  
776  
777  
778  
779  
780  
781  
782  
783  
784  
785  
786  
787  
788  
789  
790  
791  
792  
793  
794  
795  
796  
797  
798  
799  
800  
801  
802  
803  
804  
805  
806  
807  
808  
809  
810  
811  
812  
813  
814  
815  
816  
817  
818  
819  
820  
821  
822  
823  
824  
825  
826  
827  
828  
829  
830  
831  
832  
833  
834  
835  
836  
837  
838  
839  
840  
841  
842  
843  
844  
845  
846  
847  
848  
849  
850  
851  
852  
853  
854  
855  
856  
857  
858  
859  
860  
861  
862  
863  
864  
865  
866  
867  
868  
869  
870  
871  
872  
873  
874  
875  
876  
877  
878  
879  
880  
881  
882  
883  
884  
885  
886  
887  
888  
889  
890  
891  
892  
893  
894  
895  
896  
897  
898  
899  
900  
901  
902  
903  
904  
905  
906  
907  
908  
909  
910  
911  
912  
913  
914  
915  
916  
917  
918  
919  
920  
921  
922  
923  
924  
925  
926  
927  
928  
929  
930  
931  
932  
933  
934  
935  
936  
937  
938  
939  
940  
941  
942  
943  
944  
945  
946  
947  
948  
949  
950  
951  
952  
953  
954  
955  
956  
957  
958  
959  
960  
961  
962  
963  
964  
965  
966  
967  
968  
969  
970  
971  
972  
973  
974  
975  
976  
977  
978  
979  
980  
981  
982  
983  
984  
985  
986  
987  
988  
989  
990  
991  
992  
993  
994  
995  
996  
997  
998  
999  
1000

our national surveys. These strategies included accessing clinical environments (e.g. GP surgeries, hospital outpatient clinics) with paper surveys as well as sending our online survey link via the mailing lists of national organisations such as the National Osteoporosis Society to ensure as widespread inclusion of patient groups as possible. However, despite these efforts, it is possible that the research priorities reported still underrepresent the frailest group which includes those with permanent cognitive impairment for whom responding to a survey may not be possible. However, we are encouraged to see a research uncertainty in the top 10 specifically directed towards identifying the key components of a rehabilitation pathway for those with chronic cognitive impairment.

We found that research questions which were very specific - which identified the intervention and comparator within the question - tended to attract a lower ranking than more general questions asking a broader less well defined research question. For example, questions asking 'what is the best physiotherapy?' were found to attract more votes than more specific questions comparing two specific interventions (e.g. 'Which is better, tai chi or standard physiotherapy?'). This may reflect an opinion by survey respondents that broader questions may have wider impact and cover multiple interventions. Nevertheless, we felt it was important to strike a balance between more general questions and questions about specific interventions such that the spectrum of the original submissions was accurately reflected. Future prioritisation partnerships will need to consider this aspect of the process and decide on the right balance between inclusion of specific versus general indicative questions.

This work has highlighted the top research questions in lower limb and pelvic fragility fracture research. It is now up to the research community and research funders to refine and deliver the answers to these questions. We hope this work will shape the research landscape in this area and help to deliver meaningful advances in the quality-of-life and care of patients.

### **ACKNOWLEDGEMENTS**

The authors wish to acknowledge the patients, their families and friends, carers, and healthcare professionals who submitted responses to the national surveys. In addition, we would like to thank the partner organisations (Appendix 1) who supported and promoted this work, the JLA for support and guidance throughout the process, and all attendees at the final workshop who worked tirelessly to achieve a consensus on the top 10 research questions: (Vicky Crawford, Anita Vowles, Robert Crouch, Andrew McAndrew, Nigel Rees, Helen Wilson, Pippa Ellery, Cliff Shelton, Debs Smith, Josephine Rowling, Karen Keates, Stella Saunders, Sheila Holmes, Jean Maston, Shirley MacWhirter, Thelma Sanders, Sue Bremner-Milne, Diane Hackford, John Cocker, Sheela Upadhyaya, and Toto Anne Gronlund).

### **AUTHOR CONTRIBUTIONS**

MF analysed the data and wrote the manuscript. LA, JG, AM, RG, PB, SW, MB, XG, TC, DK, RK, CW, and MC provided significant edits to the manuscript and approved the data analysis. MF, LA, JG, AM, RG, PB, SW, MB, XG, TC, DK, RK, CW, and MC have all made significant contributions to the design, implementation, and delivery of this

1  
2  
3 research. All authors (MF, LA, JG, AM, RG, PB, SW, MB, XG, TC, DK, RK, CW, and MC)  
4 have read and approved the final version of this manuscript.  
5

#### 6 **FUNDING STATEMENT**

7 We would like to acknowledge the British Orthopaedic Association and the UK  
8 Orthopaedic Trauma Society who made financial contributions to support the  
9 Priority Setting Partnership. The Partnership was supported by the National Institute  
10 for Health Research (NIHR) Oxford Biomedical Research Centre (BRC). The views  
11 expressed are those of the authors and not necessarily those of the NHS, the NIHR or  
12 the Department of Health.  
13  
14

#### 15 **COMPETING INTERESTS**

16 MC is a member of the NIHR HTA General Board.  
17  
18

#### 19 **DATA SHARING STATEMENT**

20 Supplementary data including all submitted original research uncertainties and out  
21 of scope submissions can be found on the JLA website at  
22 [http://www.jla.nihr.ac.uk/priority-setting-partnerships/broken-bones-in-older-  
23 people/](http://www.jla.nihr.ac.uk/priority-setting-partnerships/broken-bones-in-older-people/)  
24  
25

26  
27 Figure Legends  
28

29 Figure 1. Flow Chart of Priority Setting Partnership Process  
30

31 Figure 2. The top ten UK research priorities in fragility fractures of the lower limb and  
32 pelvis  
33  
34  
35  
36  
37  
38  
39  
40  
41  
42  
43  
44  
45  
46  
47  
48  
49  
50  
51  
52  
53  
54  
55  
56  
57  
58  
59  
60

## REFERENCES

- 1 Johnell O, Kanis JA. An estimate of the worldwide prevalence and disability associated with osteoporotic fractures. *Osteoporos Int* 2006;**17**:1726–33. doi:10.1007/s00198-006-0172-4
- 2 Cooper C, Campion G, Melton LJ. Hip fractures in the elderly: a world-wide projection. *Osteoporos Int* 1992;**2**:285–9.
- 3 British Orthopaedic Association. The care of patients with fragility fracture. *BOA 2007* 2007.
- 4 Johnell O, Kanis JA. An estimate of the worldwide prevalence, mortality and disability associated with hip fracture. *Osteoporos Int* 2004;**15**:897–902. doi:10.1007/s00198-004-1627-0
- 5 Crowe S, Fenton M, Hall M, *et al*. Patients', clinicians' and the research communities' priorities for treatment research: there is an important mismatch. *Res Involv Engagem* 2015;**1**:2. doi:10.1186/s40900-015-0003-x
- 6 Tallon D, Chard J, Dieppe P. Relation between agendas of the research community and the research consumer. *Lancet* 2000;**355**:2037–40. doi:10.1016/S0140-6736(00)02351-5
- 7 Boddy K, Cowan K, Gibson A, *et al*. Does funded research reflect the priorities of people living with type 1 diabetes? A secondary analysis of research questions. *BMJ Open* 2017;**7**:e016540. doi:10.1136/bmjopen-2017-016540
- 8 *National Institute for Health. Going the extra mile: improving the nation's health and wellbeing through public involvement in research. 2015.* [https://www.nihr.ac.uk/about-us/documents/Extra%20Mile2.pdf (accessed 9 Sep2017)].
- 9 *James Lind Alliance Priority Setting Partnerships. 2017.* http://www.jla.nihr.ac.uk (accessed 9 Sep2017).
- 10 Boney O, Bell M, Bell N, *et al*. Identifying research priorities in anaesthesia and perioperative care: final report of the joint National Institute of Academic Anaesthesia/James Lind Alliance Research Priority Setting Partnership. 2015. e010006. doi:10.1136/bmjopen-2015-010006
- 11 *Bristol Online Survey.* http://www.onlinesurveys.ac.uk (accessed 1 Mar2018).

- 1  
2  
3 12 listed NA. Hip fracture: Management. *NICE* 2017.  
4  
5 13 Fractures (non-complex): assessment and management (NG38), *NICE*.  
6 2016.  
7  
8 14 Rangan A, Upadhaya S, Regan S, *et al.* Research priorities for shoulder  
9 surgery: results of the 2015 James Lind Alliance patient and clinician  
10 priority setting partnership. *BMJ Open* 2016;**6**:e010412.  
11 doi:10.1136/bmjopen-2015-010412  
12  
13  
14  
15  
16  
17  
18  
19  
20  
21  
22  
23  
24  
25  
26  
27  
28  
29  
30  
31  
32  
33  
34  
35  
36  
37  
38  
39  
40  
41  
42  
43  
44  
45  
46  
47  
48  
49  
50  
51  
52  
53  
54  
55  
56  
57  
58  
59  
60



1  
2  
3  
4  
5  
6  
7  
8  
9  
10  
11  
12  
13  
14  
15  
16  
17  
18  
19  
20  
21  
22  
23  
24  
25  
26  
27  
28  
29  
30  
31  
32  
33  
34  
35  
36  
37  
38  
39  
40  
41  
42  
43  
44  
45  
46  
47  
48  
49  
50  
51  
52  
53  
54  
55  
56  
57  
58  
59  
60

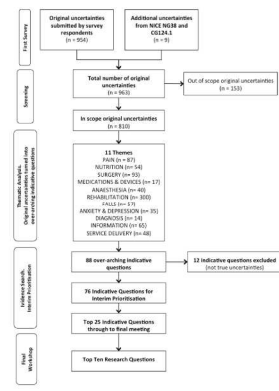

Figure 1. Flow Chart of Priority Setting Partnership Process

297x209mm (300 x 300 DPI)

new only

- Figure 2. The top ten UK research priorities in fragility fractures of the lower limb and pelvis.**
- 1) What is the best physiotherapy and/or occupational therapy regime for adults during their in-hospital recovery from a fragility fracture of the lower limb?
  - 2) What is the best physiotherapy and/or occupational therapy regime for adults during out-of-hospital recovery from a fragility fracture of the lower limb?
  - 3) What is the best way to reduce harmful blood clots in adults treated with a plaster cast (or splint) for fragility fractures of the lower limb?
  - 4) What information about recovery (e.g. rehabilitation, medication, exercises, nutrition, pain), and in what form, should be provided to patients and carers following a fragility fracture of the lower limb?
  - 5) What is the best weight bearing regime following treatment (with or without surgery) for fragility fractures of the ankle?
  - 6) What is most important to adults in their recovery from a fragility fracture of the lower limb?
  - 7) What are the best treatments to prevent and treat confusion and delirium after surgery in adults with a fragility fracture of the lower limb?
  - 8) What is the best pain relief, including non-drug therapies and alternatives to reduce morphine or opioid use, for adults with a lower limb fragility fracture during anaesthesia and immediate recovery after surgery?
  - 9) What are the key components of a rehabilitation pathway for adults with dementia/cognitive impairment following a fragility fracture of the lower limb?
  - 10) What is the best way to prevent surgical site infection in adults undergoing surgery for fragility fractures of the lower limb?

Figure 2. The top ten UK research priorities in fragility fractures of the lower limb and pelvis.

297x209mm (300 x 300 DPI)

## APPENDIX 1: PARTNER ORGANISATIONS

### ***Charity Organisations***

Carers UK  
National Care Association  
University of the Third Age (U3A)  
Association of Directors of Adult Social Services (ADASS)  
National Osteoporosis Society (NOS)  
Age Cymru  
Age Scotland  
Age UK  
Association of Medical Charities  
Involve People in research  
St Johns Ambulance  
Arthritis Research UK

### ***Personal Contacts***

AGILE (physios specializing in care of older adults)  
Dr Anglea McCullagh  
Coventry & Warwickshire Partnership Trust  
National Institute for Health Research. Collaboration for Leadership in Applied Health Research and Care. West Midlands (NIHR CLAHRC WM)  
Manor Court Surgery, Nuneaton

### ***Professional Organisations***

University/User Teaching and Research Action Partnership (UNTRAP)  
Warwickshire Carers Association & Guideposts  
Association of Trauma and Orthopaedic Chartered Physiotherapists (ATOCP)  
The Chartered Society of Physiotherapy (CSP)  
Age and Ageing  
National Osteoporosis Guideline Group (NOGG)  
National Hip Fracture Database (NHFD)  
Orthopaedic Trauma Society (OTS)  
Royal College of Emergency Medicine (RCEM)  
The National Ambulance Research Steering Group (NARSG)  
Cardiff and Vale Orthopaedic Centre (CAVOC)  
Community Health Councils in Wales  
Health and Care Research Wales  
Health and Care Research Wales Support Centre  
Health Services Research Unit – Scotland  
Healthwatch England  
Royal British Legion working with veterans  
Research User Group (RUG) NIHR Manchester  
The RNHA Registered Nursing Home Association  
Welsh Arthritis Research Network  
Age Anaesthesia Association (AAA)  
British Geriatric Society

1  
2  
3 Association of Anaesthetists of Great Britain and Ireland  
4 Hip Fracture Perioperative Network (HipPeN)  
5 National Institute of Academic Anaesthesia  
6 Royal College Anaesthetists  
7 British Orthopaedic Association (BOA)  
8 Falls and Fragility Fracture Audit Project (FFFAP)  
9 Society of Trauma Nurses (SOTN)  
10 Trauma Audit & Research Network (TARN)  
11 Cochrane  
12 Contact, Help, Advice and Information (CHAIN) Network  
13 PAIR  
14  
15  
16  
17  
18

## 19 **APPENDIX 2: RESEARCH PRIORITIES 11-25**

20  
21  
22 11) How can we improve the way we link services and the effectiveness of  
23 rehabilitation when patients transition from one environment to another (e.g. from  
24 hospital to home) following a lower limb fragility fracture?  
25

26 12) What is the best pain relief, including non-drug therapies and alternatives to  
27 reduce morphine or opioid use, for adults with a lower limb fragility fracture on  
28 arrival in hospital (in the emergency department or ward)?  
29

30  
31 13) What is the best weight bearing regime following treatment (with or without  
32 surgery) for fragility fractures of the pelvis and acetabulum (hip socket)?  
33  
34

35 14) What is the best method to assess pain in adults with and without confusion  
36 (either short term or long term such as dementia) following a lower limb fragility  
37 fracture?  
38

39  
40 15) What are the important parts of an enhanced recovery pathway (such as early  
41 mobilisation) for adults with a fragility fracture of the lower limb?  
42

43 16) What is the best pain relief, including non-drug therapies and alternatives to  
44 reduce morphine or opioid use, for adults with a lower limb fragility fracture upon  
45 discharge from hospital?  
46  
47

48 17) What is the best way to reduce harmful blood clots in adults with a fragility hip  
49 fracture?  
50

51  
52 18) What is the best intervention/method to enable and support early discharge of  
53 patients from hospital with a lower limb fragility fracture?  
54

55 19) What is the best weight bearing regime following treatment (with or without  
56 surgery) for fragility fractures of the tibial plateau (the top of the shin bone which  
57 forms part of the knee joint)?  
58  
59  
60

1  
2  
3 20) What are the best physical therapies to treat adults with a fear of falling after a  
4 lower limb fragility fracture?  
5

6  
7 21) What is the best pain relief, including non-drug therapies and alternatives to  
8 reduce morphine or opioid use, for adults with a lower limb fragility fracture during  
9 in-hospital rehabilitation?  
10

11  
12 22) What are the best psychological therapies to treat adults with a fear of falling  
13 after a lower limb fragility fracture?  
14

15 23) What are the specific barriers to hospital discharge (factors which delay or  
16 prevent discharge from hospital) for adults with a fragility fracture of the lower limb?  
17

18  
19 24) What is the best way to promote healing in adults with a fragility fracture of the  
20 lower limb?  
21

22  
23 25) What is the best treatment for surgical infections in adults following surgery for  
24 fragility fractures of the lower limb?  
25  
26  
27  
28  
29  
30  
31  
32  
33  
34  
35  
36  
37  
38  
39  
40  
41  
42  
43  
44  
45  
46  
47  
48  
49  
50  
51  
52  
53  
54  
55  
56  
57  
58  
59  
60

# BMJ Open

## Research Priorities in Fragility Fractures of the Lower Limb and Pelvis: A UK Priority Setting Partnership with the James Lind Alliance

|                                 |                                                                                                                                                                                                                                                                                                                                                                                                                                                                                                                                                                                                                                                                                                                                                                                                                                                                                                                                                                                                                                                                                                                                                                                                                                                                                    |
|---------------------------------|------------------------------------------------------------------------------------------------------------------------------------------------------------------------------------------------------------------------------------------------------------------------------------------------------------------------------------------------------------------------------------------------------------------------------------------------------------------------------------------------------------------------------------------------------------------------------------------------------------------------------------------------------------------------------------------------------------------------------------------------------------------------------------------------------------------------------------------------------------------------------------------------------------------------------------------------------------------------------------------------------------------------------------------------------------------------------------------------------------------------------------------------------------------------------------------------------------------------------------------------------------------------------------|
| Journal:                        | <i>BMJ Open</i>                                                                                                                                                                                                                                                                                                                                                                                                                                                                                                                                                                                                                                                                                                                                                                                                                                                                                                                                                                                                                                                                                                                                                                                                                                                                    |
| Manuscript ID                   | bmjopen-2018-023301.R2                                                                                                                                                                                                                                                                                                                                                                                                                                                                                                                                                                                                                                                                                                                                                                                                                                                                                                                                                                                                                                                                                                                                                                                                                                                             |
| Article Type:                   | Research                                                                                                                                                                                                                                                                                                                                                                                                                                                                                                                                                                                                                                                                                                                                                                                                                                                                                                                                                                                                                                                                                                                                                                                                                                                                           |
| Date Submitted by the Author:   | 07-Aug-2018                                                                                                                                                                                                                                                                                                                                                                                                                                                                                                                                                                                                                                                                                                                                                                                                                                                                                                                                                                                                                                                                                                                                                                                                                                                                        |
| Complete List of Authors:       | <p>Fernandez, Miguel; University of Oxford Nuffield Department of Orthopaedics Rheumatology and Musculoskeletal Sciences, Oxford Trauma; University Hospitals Coventry and Warwickshire NHS Trust, Trauma &amp; Orthopaedic Surgery</p> <p>Arnel, Laura; University of Oxford Nuffield Department of Orthopaedics Rheumatology and Musculoskeletal Sciences, Oxford Trauma</p> <p>Gould, Jenny; Patient representative</p> <p>McGibbon, Alwin; Patient representative</p> <p>Grant, Richard; Patient representative</p> <p>Bell, Philip; Patient representative</p> <p>White, Stuart; Royal Sussex County Hospital</p> <p>Baxter, Mark; University Hospital Southampton NHS Foundation Trust</p> <p>Griffin, Xavier; University of Oxford Nuffield Department of Orthopaedics Rheumatology and Musculoskeletal Sciences, Kadoorie Centre</p> <p>Chesser, Tim; North Bristol NHS Trust, Trauma &amp; Orthopaedics</p> <p>Keene, David; University of Oxford Nuffield Department of Orthopaedics Rheumatology and Musculoskeletal Sciences, Oxford Trauma</p> <p>Kearney, R.S.; University of Warwick,</p> <p>White, Catherine; James Lind Alliance</p> <p>Costa, Matthew; University of Oxford, Nuffield Department of Orthopaedics, Rheumatology, and Musculoskeletal Sciences</p> |
| <b>Primary Subject Heading</b>: | Qualitative research                                                                                                                                                                                                                                                                                                                                                                                                                                                                                                                                                                                                                                                                                                                                                                                                                                                                                                                                                                                                                                                                                                                                                                                                                                                               |
| Secondary Subject Heading:      | Surgery, Qualitative research                                                                                                                                                                                                                                                                                                                                                                                                                                                                                                                                                                                                                                                                                                                                                                                                                                                                                                                                                                                                                                                                                                                                                                                                                                                      |
| Keywords:                       | Adult orthopaedics < ORTHOPAEDIC & TRAUMA SURGERY, Musculoskeletal disorders < ORTHOPAEDIC & TRAUMA SURGERY, Hip < ORTHOPAEDIC & TRAUMA SURGERY, fragility fractures                                                                                                                                                                                                                                                                                                                                                                                                                                                                                                                                                                                                                                                                                                                                                                                                                                                                                                                                                                                                                                                                                                               |
|                                 |                                                                                                                                                                                                                                                                                                                                                                                                                                                                                                                                                                                                                                                                                                                                                                                                                                                                                                                                                                                                                                                                                                                                                                                                                                                                                    |

SCHOLARONE™  
Manuscripts

1  
2  
3 **Research Priorities in Fragility Fractures of the Lower Limb and Pelvis: A UK Priority**  
4 **Setting Partnership with the James Lind Alliance.**  
5

6 M. A. Fernandez<sup>1,2\*</sup>, L. Arnel<sup>1</sup>, J. Gould<sup>3</sup>, A. McGibbon<sup>3</sup>, R. Grant<sup>3</sup>, P. Bell<sup>3</sup>, S. White<sup>4</sup>,  
7 M. Baxter<sup>5</sup>, X. Griffin<sup>1</sup>, T. Chesser<sup>6</sup>, D. Keene<sup>1</sup>, R. S. Kearney<sup>7</sup>, C. White<sup>8</sup>, and M. L.  
8 Costa<sup>1</sup>  
9

10  
11  
12 <sup>1</sup>Oxford Trauma, University of Oxford, Kadoorie Centre, John Radcliffe Hospital,  
13 Headley Way, Oxford OX3 9DU, UK  
14

15 <sup>2</sup>University Hospitals Coventry & Warwickshire NHS Trust, Clifford Bridge Road,  
16 Coventry, CV2 2DX, UK  
17

18 <sup>3</sup> Patient representatives, UK  
19

20 <sup>4</sup>Royal Sussex County Hospital, Brighton, BN2 5BE, UK  
21

22 <sup>5</sup>University Hospital Southampton NHS Foundation Trust, Tremona Road,  
23 Southampton, SO16 6YD, UK  
24

25 <sup>6</sup>North Bristol NHS Trust, Southmead Hospital, Bristol BS10 5NB, UK  
26

27 <sup>7</sup>University of Warwick, Clinical Trials Unit, Gibbet Hill Road, Coventry, CV4 7AL, UK  
28

29 <sup>8</sup>James Lind Alliance advisor (to Feb 2018), National Institute for Health Research,  
30 University of Southampton, Enterprise Road, Southampton, SO16 7NS, UK  
31

32 \*corresponding author: Mr M. A. Fernandez, Oxford Trauma, University of Oxford,  
33 Kadoorie Centre, John Radcliffe Hospital, Headley Way, Oxford OX3 9DU, UK.  
34 [miguel.fernandez@ndorms.ox.ac.uk](mailto:miguel.fernandez@ndorms.ox.ac.uk) Tel. 07939250006  
35

36  
37  
38  
39  
40  
41 **Keywords:** Adult orthopaedics, fragility fractures, lower limb, priority setting  
42 partnership  
43

44 **Word count:** 2860  
45  
46  
47  
48  
49  
50  
51  
52  
53  
54  
55  
56  
57  
58  
59  
60



## ABSTRACT

**Objective:** To determine research priorities in fragility fractures of the lower limb and pelvis, which represent the shared priorities of patients, their friends and families, carers, and healthcare professionals.

**Design/Setting:** A national (UK) research Priority Setting Partnership.

**Participants:** Patients: over 60 years of age who have experienced a fragility fracture of the lower limb or pelvis; carers involved in their care (both in and out of hospital); family and friends of patients; healthcare professionals involved in the treatment of these patients including but not limited to surgeons, anaesthetists, paramedics, nurses, general practitioners, physicians, physiotherapists, and occupational therapists.

**Methods:** Using a multi-phase methodology in partnership with the James Lind Alliance over 18-months (August 2016 - January 2018), a national scoping survey asked respondents to submit their research uncertainties. These were amalgamated into a smaller number of research questions. The existing evidence was searched to ensure that the questions had not been answered. A second national survey asked respondents to prioritise the research questions. A final shortlist of 25 questions was taken to a multi-stakeholder workshop where a consensus was reached on the top 10 priorities.

**Results:** There were 963 original uncertainties submitted by 365 respondents to the first survey. These original uncertainties were refined into 88 research questions of which 76 were judged to be true uncertainties following a review of the research evidence. Healthcare professionals and other stakeholders (patients, carers, friends and families) were represented equally in the responses. The top ten represent uncertainties in rehabilitation, pain management, anaesthesia, and surgery.

**Conclusions:** We report the top 10 UK research priorities in patients with fragility fractures of the lower limb and pelvis. The priorities highlight uncertainties in rehabilitation, postoperative physiotherapy, pain, weight bearing, infection, and thromboprophylaxis. The challenge now is to refine and deliver answers to these research priorities.

## STRENGTHS AND LIMITATIONS OF THIS STUDY

- Use of established and transparent James Lind Alliance methodology.
- Survey responses from all over the UK with a 50:50 split between healthcare professionals and non-healthcare professionals (patients, carers, family & friends).
- While the research priorities are now reported, it is up to the research community and research funding organisations to refine and deliver the answers to these questions.

## INTRODUCTION

An estimated nine million fragility fractures occurred worldwide in the year 2000, with 50 million people suffering from the sequelae of these fractures.[1] Hip fractures alone are expected to rise from 1.31 million in 1990 to an estimated 6.26 million per year globally by 2050.[2] In the UK over 300,000 patients present to hospital with fragility fractures[3] and the associated treatment costs are around 2% of the total healthcare burden in the UK – approximately £3billion per year.[4]

Adults with fragility fractures of the lower limb or pelvis usually require treatment in hospital and often have other medical comorbidities, along with complex health and social care needs requiring intervention from a number of healthcare professionals and carers.

There is evidence of a mismatch between the research priorities of patients and healthcare professionals and the research which is actually undertaken and delivered.[5-7] This situation is changing. Patient and public involvement (PPI) in research has flourished in the UK, driven by the National Institute of Health Research (NIHR) such that PPI involvement is now a key part of the design, conduct and delivery of research in health and social care.[8]

The James Lind Alliance (JLA) is a non-profit organisation hosted by the NIHR with the aim of raising awareness of research which is directly relevant and of potential benefit to patients and treating clinicians. The guiding principle is to bring together patients, carers, and clinicians to identify and agree on which research uncertainties are most important. To date, there have been over 50 priority setting partnerships across a range of disciplines with over 100 research topics addressed as a direct result of the JLA priority setting partnerships.[9,10]

The aim of this work is to establish the research priorities for adults with fragility fractures of the lower limb and pelvis, which represent the shared interests and priorities of patients, their families and friends, carers, and healthcare professionals.

## METHODS

The 'Broken Bones in Older People' priority setting partnership (PSP) took place over an 18-month period between August 2016 and January 2018. An overview of the methodology is shown in Figure 1.

### Steering group & Partner Organisations

The clinical lead (MC) initiated the priority setting partnership and guided the appointment of a steering group to oversee and contribute to the process. The steering group consisted of patient representatives, healthcare professionals, and carers with established links to relevant partner organisations (see Appendix 1) to ensure that a range of stakeholder groups were represented. Steering group members did so on a voluntary basis and were expected to commit to the whole process where possible. A JLA Adviser (CW) supported and guided the PSP as a neutral facilitator to ensure that it was undertaken in a fair and transparent way encouraging equal contributions from patients, carers and healthcare professionals. This is an important aspect of the JLA process and ensures that all voices are heard and respected throughout the process. An information specialist (MF) managed the

1  
2  
3 data and performed the analysis. This was overseen and advised on by the steering  
4 group.  
5

### 6 **Scope**

7 All research uncertainties related to fragility fractures of the lower limbs and pelvis  
8 for patients over 60 years of age were considered in scope. All stages of the patient  
9 pathway were eligible including the immediate care of fragility fractures by the  
10 emergency services, acute in-hospital care, and out-of-hospital care. Primary  
11 prevention strategies for fragility fractures were excluded. The decisions about  
12 whether submissions were in or out-of-scope were made by the information  
13 specialist and subsequently verified by the steering group.  
14  
15

### 16 **Ethics Statement**

17 This work did not require ethics approval as per the JLA guidance[11] and guidance  
18 published by the NHS National Patient Safety Agency National Research Ethics  
19 Service.[12] Respondents to the surveys provided written consent to the inclusion of  
20 their anonymised data in this process.  
21  
22  
23

### 24 **Scoping Survey & Identification of Themes**

25 A national scoping survey asked respondents to submit their research uncertainties  
26 and provide some optional basic demographic information (gender, first three  
27 letters of their postcode, and to identify themselves as either a carer, patient,  
28 family/friend of someone over 60 years of age with a fragility fracture, or a  
29 healthcare professional). The survey was circulated via the steering group and their  
30 partner organisations as an open invitation. The survey was available in both paper  
31 and online formats (Bristol online survey tool)[13]. A pilot phase was undertaken to  
32 ensure that the survey was clearly written, understandable to all groups, and easy to  
33 complete. In addition to submissions from survey respondents, we included research  
34 uncertainties highlighted in relevant national guidelines published by The National  
35 Institute for Health and Care Excellence (NICE).[14,15]  
36

37 All original submissions were analysed using techniques common to qualitative  
38 thematic analysis to define themes and subthemes. The process included initial data  
39 immersion (reading and re-reading the submissions), coding of common  
40 ideas/themes, identification and naming of themes and subthemes, and a final  
41 review to refine the overarching themes. The thematic analysis was undertaken by  
42 the information specialist and decisions verified by the steering group. In order to do  
43 this the steering group were given to the opportunity to review all of the original  
44 submissions under each theme/subtheme. These were then referred to during the  
45 verification process.  
46  
47  
48  
49

### 50 **Indicative Questions & Evidence Search**

51 The overarching themes and subthemes from the thematic analysis were used to  
52 generate a smaller number of representative research questions, so called 'indicative  
53 questions'. These were derived from the original submissions and were designed to  
54 summarise the submissions within each subtheme/theme. The information specialist  
55 undertook this process. The indicative questions were then reviewed by the steering  
56  
57  
58  
59  
60

1  
2  
3 group along with a selection of the original uncertainties to ensure that they were a  
4 true representation, and to ensure that the language used was understandable to all  
5 stakeholder groups. For each indicative question, a review of the current research  
6 evidence was undertaken to ensure that the proposed indicative questions were  
7 'true uncertainties' and had not already been answered by research. MF searched  
8 PubMed, the grey literature ([www.opengrey.eu](http://www.opengrey.eu)), The Cochrane Central Register of  
9 Controlled Trials (CENTRAL) ([www.cochranelibrary.com/about/central-landing-  
10 page.html](http://www.cochranelibrary.com/about/central-landing-page.html)), The WHO international Clinical Trials Registry Platform Search Portal  
11 (<http://www.who.int/ictrp/en>), Current Controlled trials  
12 (<http://www.controlledtrials.com/isrctn/>), the US National Institute of Health Trials  
13 Registry (<https://clinicaltrials.gov>), and published UK national guidelines.[14,15]  
14 Indicative questions were excluded if the steering group agreed that high quality  
15 evidence was found (e.g. large clinical trials either published or in-progress,  
16 published meta-analyses, or published national evidence based guidelines). The  
17 remaining indicative questions went through to interim prioritisation.  
18  
19  
20

### 21 **Interim Prioritisation Survey**

22 A second national survey asked respondents to state the importance of each  
23 indicative question on a five level Likert scale (1 not important, 2 low importance, 3  
24 no opinion, 4 high importance, 5 extremely important). The survey was available in  
25 paper and online formats and went through a pilot phase prior to launch. The  
26 second survey was again circulated as an open invitation and not restricted to  
27 respondents from the first survey. All indicative questions were ranked (interim  
28 prioritisation) by calculating a mean score per question based on the number of  
29 responses at each of the five response levels. The results were reviewed by the  
30 steering group who decided to take the top 25 to the final workshop.  
31  
32  
33

### 34 **Final Workshop**

35 This was a one-day multi-stakeholder workshop involving patients, carers, and  
36 healthcare professionals. Participants worked in small groups to independently rank  
37 the top 25 indicative questions from the interim prioritisation process. The  
38 combined results of small group discussions were presented to the whole group.  
39 These were considered before a further round of small group discussions. Finally, the  
40 whole group came back together again to establish a consensus on the top 10  
41 research priorities for fragility fractures of the lower limb and pelvis. The role of the  
42 steering group at this stage was to ensure that patients and carers were well  
43 supported with information and with practical support on the day. As places in the  
44 final workshop were limited, the majority of the steering group did not participate in  
45 the final workshop.  
46  
47  
48

### 49 **Patient & Public Involvement**

50 Patient and carer representatives were actively involved throughout the process;  
51 from the initial stages of planning and overseeing the study as part of the steering  
52 group, to participation in the final workshop to ensure that the patient and carer  
53 'voice' was represented in the final prioritisation. The steering group made particular  
54 efforts to approach a diverse range of patient and carer groups across a number of  
55 settings to encourage responses to the surveys. The dissemination strategy of this  
56  
57  
58  
59

work includes a plain English summary alongside the scientific publication, which will be circulated to the partner organisations and PPI groups.

## RESULTS

Nine hundred and sixty-three research uncertainties were submitted by 365 respondents to the first survey. After removal of 'out-of-scope' uncertainties, there were 810 remaining. Respondents were located throughout the UK. Fifty-one percent (51%) of respondents identified themselves as healthcare professionals and 49% non-healthcare professionals (23% family and friends, 16% patients, 10% carers).

Eleven themes were identified: pain, nutrition, surgery, medications & devices, anaesthesia, rehabilitation, falls, anxiety & depression, diagnosis, information, and service delivery. From these themes 88 indicative questions were formulated to represent the original uncertainties. Twelve indicative questions were excluded following a search of the research evidence leaving 76 indicative questions for interim prioritisation.

The interim prioritisation survey received 209 responses from different regions of the UK of which 47% identified themselves as healthcare professionals and 53% non-healthcare professionals (15% family & friends, 28% patients, 10% carers). Each question was scored based on the responses to interim prioritisation and ranked from positions 1 to 76. The ranking was reviewed by the steering group and the top 25 questions were taken to the final prioritisation workshop where a consensus was reached on the top 10 research priorities (see Figure 2 for priorities 1-10 and Appendix 2 for priorities 11-25). You can see the full list of original uncertainties and indicative research questions at the following websites:

[www.jla.nihr.ac.uk/priority-setting-partnerships/broken-bones-in-older-people/](http://www.jla.nihr.ac.uk/priority-setting-partnerships/broken-bones-in-older-people/)  
[www.ndorms.ox.ac.uk/research-groups/oxford-trauma/broken-bones-in-older-people](http://www.ndorms.ox.ac.uk/research-groups/oxford-trauma/broken-bones-in-older-people)

## DISCUSSION

We have reported the results of a UK priority setting partnership with the James Lind Alliance and identified the top 10 research priorities in patients with fragility fractures of the lower limb and pelvis. These research priorities represent the shared interests of the multiple stakeholders affected by fragility fractures: patients, family & friends, carers, and healthcare professionals. The top 10 priorities emphasise the lack of evidence to guide 'rehabilitation' following fragility fracture and highlight a number of unanswered questions in postoperative physiotherapy, weight-bearing, as well as rehabilitation pathways for patients with cognitive impairment.

This study has a number of strengths. This is the first study to report national research priorities in fragility fractures of the lower limb and pelvis in partnership with the James Lind Alliance. These priorities compliment research priorities highlighted by national guidelines in this area which also highlight research uncertainties in rehabilitation and physiotherapy.[14] Patient and carers were actively involved at all stages of the process to ensure that the patient voice was

1  
2  
3 heard and remained at the centre of our efforts. We used the established and  
4 transparent JLA methodology to conduct this priority setting partnership. All the  
5 original research submissions, as well as the indicative questions (76 in total) are  
6 available on the JLA website.[9] The number of survey responses were comparable  
7 to other JLA priority setting partnerships,[16] and we achieved a 50:50 balance  
8 between responses from healthcare professionals and non-healthcare professionals.  
9 Responses were submitted from all over the UK and we are therefore confident that  
10 this work represents a national viewpoint.

11  
12 Fragility fractures affect frail older people disproportionately. Considerable efforts  
13 were required to ensure that all patient groups were able to access and respond to  
14 our national surveys. These strategies included accessing clinical environments (e.g.  
15 GP surgeries, hospital outpatient clinics) with paper surveys as well as sending our  
16 online survey link via the mailing lists of national organisations such as the National  
17 Osteoporosis Society to ensure as widespread inclusion of patient groups as  
18 possible. However, despite these efforts, it is possible that the research priorities  
19 reported still underrepresent the frailest group which includes those with  
20 permanent cognitive impairment for whom responding to a survey may not be  
21 possible. However, we are encouraged to see a research uncertainty in the top 10  
22 specifically directed towards identifying the key components of a rehabilitation  
23 pathway for those with chronic cognitive impairment.

24  
25 We found that research questions which were very specific - which identified the  
26 intervention and comparator within the question - tended to attract a lower ranking  
27 than more general questions asking a broader less well defined research question.  
28 For example, questions asking 'what is the best physiotherapy?' were found to  
29 attract more votes than more specific questions comparing two specific  
30 interventions (e.g. 'Which is better, tai chi or standard physiotherapy?'). This may  
31 reflect an opinion by survey respondents that broader questions may have wider  
32 impact and cover multiple interventions. Nevertheless, we felt it was important to  
33 strike a balance between more general questions and questions about specific  
34 interventions such that the spectrum of the original submissions was accurately  
35 reflected. Future prioritisation partnerships will need to consider this aspect of the  
36 process and decide on the right balance between inclusion of specific versus general  
37 indicative questions.

38  
39 This work has highlighted the top research questions in lower limb and pelvic  
40 fragility fracture research. It is now up to the research community and research  
41 funders to refine and deliver the answers to these questions. We hope this work will  
42 shape the research landscape in this area and help to deliver meaningful advances in  
43 the quality-of-life and care of patients.  
44  
45  
46

#### 47 **ACKNOWLEDGEMENTS**

48  
49 The authors wish to acknowledge the patients, their families and friends, carers, and  
50 healthcare professionals who submitted responses to the national surveys. In  
51 addition, we would like to thank the partner organisations (Appendix 1) who  
52 supported and promoted this work, the JLA for support and guidance throughout the  
53 process, and all attendees at the final workshop who worked tirelessly to achieve a  
54 consensus on the top 10 research questions: (Vicky Crawford, Anita Vowles, Robert  
55 Crouch, Andrew McAndrew, Nigel Rees, Helen Wilson, Pippa Ellery, Cliff Shelton,  
56  
57  
58  
59



1  
2  
3 Debs Smith, Josephine Rowling, Karen Keates, Stella Saunders, Sheila Holmes, Jean  
4 Maston, Shirley MacWhirter, Thelma Sanders, Sue Bremner-Milne, Diane Hackford,  
5 John Cocker, Sheela Upadhyaya, and Toto Anne Gronlund).

### 7 **AUTHOR CONTRIBUTIONS**

8 MF analysed the data and wrote the manuscript. LA, JG, AM, RG, PB, SW, MB, XG,  
9 TC, DK, RK, CW, and MC provided significant edits to the manuscript and approved  
10 the data analysis. MF, LA, JG, AM, RG, PB, SW, MB, XG, TC, DK, RK, CW, and MC have  
11 all made significant contributions to the design, implementation, and delivery of this  
12 research. All authors (MF, LA, JG, AM, RG, PB, SW, MB, XG, TC, DK, RK, CW, and MC)  
13 have read and approved the final version of this manuscript.  
14  
15

### 16 **FUNDING STATEMENT**

17 We would like to acknowledge the British Orthopaedic Association and the UK  
18 Orthopaedic Trauma Society who made financial contributions to support the  
19 Priority Setting Partnership. The Partnership was supported by the National Institute  
20 for Health Research (NIHR) Oxford Biomedical Research Centre (BRC). The views  
21 expressed are those of the authors and not necessarily those of the NHS, the NIHR or  
22 the Department of Health.  
23  
24

### 25 **COMPETING INTERESTS**

26 MC is a member of the NIHR HTA General Board.  
27  
28

### 29 **DATA SHARING STATEMENT**

30 Supplementary data including all submitted original research uncertainties and out  
31 of scope submissions can be found on the JLA website at  
32 [http://www.jla.nihr.ac.uk/priority-setting-partnerships/broken-bones-in-older-  
33 people/](http://www.jla.nihr.ac.uk/priority-setting-partnerships/broken-bones-in-older-people/)  
34  
35

### 36 **Figure Legends**

37  
38  
39  
40 Figure 1. Flow Chart of Priority Setting Partnership Process

41  
42 Figure 2. The top ten UK research priorities in fragility fractures of the lower limb and  
43 pelvis  
44  
45  
46  
47  
48  
49  
50  
51  
52  
53  
54  
55  
56  
57  
58  
59  
60



## REFERENCES

- 1 Johnell O, Kanis JA. An estimate of the worldwide prevalence and disability associated with osteoporotic fractures. *Osteoporos Int* 2006;**17**:1726–33. doi:10.1007/s00198-006-0172-4
- 2 Cooper C, Campion G, Melton LJ. Hip fractures in the elderly: a world-wide projection. *Osteoporos Int* 1992;**2**:285–9.
- 3 British Orthopaedic Association. The care of patients with fragility fracture. *BOA 2007* 2007.
- 4 Johnell O, Kanis JA. An estimate of the worldwide prevalence, mortality and disability associated with hip fracture. *Osteoporos Int* 2004;**15**:897–902. doi:10.1007/s00198-004-1627-0
- 5 Crowe S, Fenton M, Hall M, *et al*. Patients', clinicians' and the research communities' priorities for treatment research: there is an important mismatch. *Res Involv Engagem* 2015;**1**:2. doi:10.1186/s40900-015-0003-x
- 6 Tallon D, Chard J, Dieppe P. Relation between agendas of the research community and the research consumer. *Lancet* 2000;**355**:2037–40. doi:10.1016/S0140-6736(00)02351-5
- 7 Boddy K, Cowan K, Gibson A, *et al*. Does funded research reflect the priorities of people living with type 1 diabetes? A secondary analysis of research questions. *BMJ Open* 2017;**7**:e016540. doi:10.1136/bmjopen-2017-016540
- 8 National Institute for Health. *Going the extra mile: improving the nation's health and wellbeing through public involvement in research*. 2015. [www.nihr.ac.uk/about-us/documents/Extra%20Mile2.pdf](http://www.nihr.ac.uk/about-us/documents/Extra%20Mile2.pdf) (accessed 9 Sep2017).
- 9 James Lind Alliance Priority Setting Partnerships. 2017. [www.jla.nihr.ac.uk](http://www.jla.nihr.ac.uk) (accessed 5 Aug2018).
- 10 Boney O, Bell M, Bell N, *et al*. Identifying research priorities in anaesthesia and perioperative care: final report of the joint National Institute of Academic Anaesthesia/James Lind Alliance Research Priority Setting Partnership. 2015. e010006. doi:10.1136/bmjopen-2015-010006
- 11 *JLA Guidebook*. [www.jla.nihr.ac.uk/jla-guidebook/chapter-4/consent-and-ethics.htm](http://www.jla.nihr.ac.uk/jla-guidebook/chapter-4/consent-and-ethics.htm) (accessed 5 Aug2018).
- 12 Health Research Authority / INVOLVE (2016), Public involvement in research and research ethics committee review. Published Online First:

1  
2  
3 5 August 2016. [www.invo.org.uk/posttypepublication/patient-and-public-involvement-in-research-and-research-ethics-committee-review](http://www.invo.org.uk/posttypepublication/patient-and-public-involvement-in-research-and-research-ethics-committee-review)

4  
5  
6 13 *Bristol Online Survey*. <http://www.onlinesurveys.ac.uk> (accessed 1  
7 Mar2018).

8  
9 14 No authors listed. Hip fracture: Management. *NICE* 2017.

10  
11 15 Fractures (non-complex): assessment and management (NG38), NICE.  
12 2016.

13  
14 16 Rangan A, Upadhaya S, Regan S, *et al*. Research priorities for shoulder  
15 surgery: results of the 2015 James Lind Alliance patient and clinician  
16 priority setting partnership. *BMJ Open* 2016;**6**:e010412.  
17 doi:10.1136/bmjopen-2015-010412  
18  
19  
20  
21  
22  
23  
24  
25  
26  
27  
28  
29  
30  
31  
32  
33  
34  
35  
36  
37  
38  
39  
40  
41  
42  
43  
44  
45  
46  
47  
48  
49  
50  
51  
52  
53  
54  
55  
56  
57  
58  
59  
60

1  
2  
3  
4  
5  
6  
7  
8  
9  
10  
11  
12  
13  
14  
15  
16  
17  
18  
19  
20  
21  
22  
23  
24  
25  
26  
27  
28  
29  
30  
31  
32  
33  
34  
35  
36  
37  
38  
39  
40  
41  
42  
43  
44  
45  
46  
47  
48  
49  
50  
51  
52  
53  
54  
55  
56  
57  
58  
59  
60



Figure 1. Flow Chart of Priority Setting Partnership Process

297x209mm (300 x 300 DPI)

new only

- Figure 2. The top ten UK research priorities in fragility fractures of the lower limb and pelvis.**
- 1) What is the best physiotherapy and/or occupational therapy regime for adults during their in-hospital recovery from a fragility fracture of the lower limb?
  - 2) What is the best physiotherapy and/or occupational therapy regime for adults during out-of-hospital recovery from a fragility fracture of the lower limb?
  - 3) What is the best way to reduce harmful blood clots in adults treated with a plaster cast (or splint) for fragility fractures of the lower limb?
  - 4) What information about recovery (e.g. rehabilitation, medication, exercises, nutrition, pain), and in what form, should be provided to patients and carers following a fragility fracture of the lower limb?
  - 5) What is the best weight bearing regime following treatment (with or without surgery) for fragility fractures of the ankle?
  - 6) What is most important to adults in their recovery from a fragility fracture of the lower limb?
  - 7) What are the best treatments to prevent and treat confusion and delirium after surgery in adults with a fragility fracture of the lower limb?
  - 8) What is the best pain relief, including non-drug therapies and alternatives to reduce morphine or opioid use, for adults with a lower limb fragility fracture during anaesthesia and immediate recovery after surgery?
  - 9) What are the key components of a rehabilitation pathway for adults with dementia/cognitive impairment following a fragility fracture of the lower limb?
  - 10) What is the best way to prevent surgical site infection in adults undergoing surgery for fragility fractures of the lower limb?

Figure 2. The top ten UK research priorities in fragility fractures of the lower limb and pelvis.

297x209mm (300 x 300 DPI)

## APPENDIX 1: PARTNER ORGANISATIONS

### ***Charity Organisations***

Carers UK  
National Care Association  
University of the Third Age (U3A)  
Association of Directors of Adult Social Services (ADASS)  
National Osteoporosis Society (NOS)  
Age Cymru  
Age Scotland  
Age UK  
Association of Medical Charities  
Involve People in research  
St Johns Ambulance  
Arthritis Research UK

### ***Personal Contacts***

AGILE (physios specializing in care of older adults)  
Dr Anglea McCullagh  
Coventry & Warwickshire Partnership Trust  
National Institute for Health Research. Collaboration for Leadership in Applied Health Research and Care. West Midlands (NIHR CLAHRC WM)  
Manor Court Surgery, Nuneaton

### ***Professional Organisations***

University/User Teaching and Research Action Partnership (UNTRAP)  
Warwickshire Carers Association & Guideposts  
Association of Trauma and Orthopaedic Chartered Physiotherapists (ATOCP)  
The Chartered Society of Physiotherapy (CSP)  
Age and Ageing  
National Osteoporosis Guideline Group (NOGG)  
National Hip Fracture Database (NHFD)  
Orthopaedic Trauma Society (OTS)  
Royal College of Emergency Medicine (RCEM)  
The National Ambulance Research Steering Group (NARSG)  
Cardiff and Vale Orthopaedic Centre (CAVOC)  
Community Health Councils in Wales  
Health and Care Research Wales  
Health and Care Research Wales Support Centre  
Health Services Research Unit – Scotland  
Healthwatch England  
Royal British Legion working with veterans  
Research User Group (RUG) NIHR Manchester  
The RNHA Registered Nursing Home Association  
Welsh Arthritis Research Network  
Age Anaesthesia Association (AAA)  
British Geriatric Society

1  
2  
3 Association of Anaesthetists of Great Britain and Ireland  
4 Hip Fracture Perioperative Network (HipPeN)  
5 National Institute of Academic Anaesthesia  
6 Royal College Anaesthetists  
7 British Orthopaedic Association (BOA)  
8 Falls and Fragility Fracture Audit Project (FFFAP)  
9 Society of Trauma Nurses (SOTN)  
10 Trauma Audit & Research Network (TARN)  
11 Cochrane  
12 Contact, Help, Advice and Information (CHAIN) Network  
13 PAIR  
14  
15  
16  
17  
18

## 19 **APPENDIX 2: RESEARCH PRIORITIES 11-25**

20  
21  
22 11) How can we improve the way we link services and the effectiveness of  
23 rehabilitation when patients transition from one environment to another (e.g. from  
24 hospital to home) following a lower limb fragility fracture?  
25

26 12) What is the best pain relief, including non-drug therapies and alternatives to  
27 reduce morphine or opioid use, for adults with a lower limb fragility fracture on  
28 arrival in hospital (in the emergency department or ward)?  
29

30  
31 13) What is the best weight bearing regime following treatment (with or without  
32 surgery) for fragility fractures of the pelvis and acetabulum (hip socket)?  
33  
34

35 14) What is the best method to assess pain in adults with and without confusion  
36 (either short term or long term such as dementia) following a lower limb fragility  
37 fracture?  
38

39  
40 15) What are the important parts of an enhanced recovery pathway (such as early  
41 mobilisation) for adults with a fragility fracture of the lower limb?  
42

43 16) What is the best pain relief, including non-drug therapies and alternatives to  
44 reduce morphine or opioid use, for adults with a lower limb fragility fracture upon  
45 discharge from hospital?  
46  
47

48 17) What is the best way to reduce harmful blood clots in adults with a fragility hip  
49 fracture?  
50

51  
52 18) What is the best intervention/method to enable and support early discharge of  
53 patients from hospital with a lower limb fragility fracture?  
54

55 19) What is the best weight bearing regime following treatment (with or without  
56 surgery) for fragility fractures of the tibial plateau (the top of the shin bone which  
57 forms part of the knee joint)?  
58  
59  
60

1  
2  
3 20) What are the best physical therapies to treat adults with a fear of falling after a  
4 lower limb fragility fracture?  
5

6  
7 21) What is the best pain relief, including non-drug therapies and alternatives to  
8 reduce morphine or opioid use, for adults with a lower limb fragility fracture during  
9 in-hospital rehabilitation?  
10

11  
12 22) What are the best psychological therapies to treat adults with a fear of falling  
13 after a lower limb fragility fracture?  
14

15 23) What are the specific barriers to hospital discharge (factors which delay or  
16 prevent discharge from hospital) for adults with a fragility fracture of the lower limb?  
17

18  
19 24) What is the best way to promote healing in adults with a fragility fracture of the  
20 lower limb?  
21

22  
23 25) What is the best treatment for surgical infections in adults following surgery for  
24 fragility fractures of the lower limb?  
25  
26  
27  
28  
29  
30  
31  
32  
33  
34  
35  
36  
37  
38  
39  
40  
41  
42  
43  
44  
45  
46  
47  
48  
49  
50  
51  
52  
53  
54  
55  
56  
57  
58  
59  
60
