# Supplementary material for: Research priorities in fragility fractures of the lower limb and pelvis: a UK priority setting partnership with the James Lind Alliance
Source: PubMed Central journal article supplement — BMJ Open. 2018 Oct 3;8(10):e023301. doi: 10.1136/bmjopen-2018-023301 (PMC6194466; doi:10.1136/bmjopen-2018-023301), 2018-10-03
Supplement: bmjopen-2018-023301supp001.pdf [file bmjopen-2018-023301supp001.pdf]

## **APPENDIX 1: PARTNER ORGANISATIONS**

### ***Charity Organisations***

Carers UK  
National Care Association  
University of the Third Age (U3A)  
Association of Directors of Adult Social Services (ADASS)  
National Osteoporosis Society (NOS)  
Age Cymru  
Age Scotland  
Age UK  
Association of Medical Charities  
Involve People in research  
St Johns Ambulance  
Arthritis Research UK

### ***Personal Contacts***

AGILE (physios specializing in care of older adults)  
Dr Anglea McCullagh  
Coventry & Warwickshire Partnership Trust  
National Institute for Health Research. Collaboration for Leadership in Applied Health Research and Care. West Midlands (NIHR CLAHRC WM)  
Manor Court Surgery, Nuneaton

### ***Professional Organisations***

University/User Teaching and Research Action Partnership (UNTRAP)  
Warwickshire Carers Association & Guideposts  
Association of Trauma and Orthopaedic Chartered Physiotherapists (ATOCP)  
The Chartered Society of Physiotherapy (CSP)  
Age and Ageing  
National Osteoporosis Guideline Group (NOGG)  
National Hip Fracture Database (NHFD)  
Orthopaedic Trauma Society (OTS)  
Royal College of Emergency Medicine (RCEM)  
The National Ambulance Research Steering Group (NARSG)  
Cardiff and Vale Orthopaedic Centre (CAVOC)  
Community Health Councils in Wales  
Health and Care Research Wales  
Health and Care Research Wales Support Centre  
Health Services Research Unit – Scotland  
Healthwatch England  
Royal British Legion working with veterans  
Research User Group (RUG) NIHR Manchester  
The RNHA Registered Nursing Home Association  
Welsh Arthritis Research Network  
Age Anaesthesia Association (AAA)  
British Geriatric Society

Association of Anaesthetists of Great Britain and Ireland  
Hip Fracture Perioperative Network (HipPeN)  
National Institute of Academic Anaesthesia  
Royal College Anaesthetists  
British Orthopaedic Association (BOA)  
Falls and Fragility Fracture Audit Project (FFFAP)  
Society of Trauma Nurses (SOTN)  
Trauma Audit & Research Network (TARN)  
Cochrane  
Contact, Help, Advice and Information (CHAIN) Network  
PAIR

## **APPENDIX 2: RESEARCH PRIORITIES 11-25**

11) How can we improve the way we link services and the effectiveness of rehabilitation when patients transition from one environment to another (e.g. from hospital to home) following a lower limb fragility fracture?

12) What is the best pain relief, including non-drug therapies and alternatives to reduce morphine or opioid use, for adults with a lower limb fragility fracture on arrival in hospital (in the emergency department or ward)?

13) What is the best weight bearing regime following treatment (with or without surgery) for fragility fractures of the pelvis and acetabulum (hip socket)?

14) What is the best method to assess pain in adults with and without confusion (either short term or long term such as dementia) following a lower limb fragility fracture?

15) What are the important parts of an enhanced recovery pathway (such as early mobilisation) for adults with a fragility fracture of the lower limb?

16) What is the best pain relief, including non-drug therapies and alternatives to reduce morphine or opioid use, for adults with a lower limb fragility fracture upon discharge from hospital?

17) What is the best way to reduce harmful blood clots in adults with a fragility hip fracture?

18) What is the best intervention/method to enable and support early discharge of patients from hospital with a lower limb fragility fracture?

19) What is the best weight bearing regime following treatment (with or without surgery) for fragility fractures of the tibial plateau (the top of the shin bone which forms part of the knee joint)?

20) What are the best physical therapies to treat adults with a fear of falling after a lower limb fragility fracture?

21) What is the best pain relief, including non-drug therapies and alternatives to reduce morphine or opioid use, for adults with a lower limb fragility fracture during in-hospital rehabilitation?

22) What are the best psychological therapies to treat adults with a fear of falling after a lower limb fragility fracture?

23) What are the specific barriers to hospital discharge (factors which delay or prevent discharge from hospital) for adults with a fragility fracture of the lower limb?

24) What is the best way to promote healing in adults with a fragility fracture of the lower limb?

25) What is the best treatment for surgical infections in adults following surgery for fragility fractures of the lower limb?
